# Supplementary material
Source: MDPI journal article supplement (https://www.mdpi.com/2071-1050/14/11/6690)

Figure S1. Autocorrelation Function (ACF) plot of SPI3

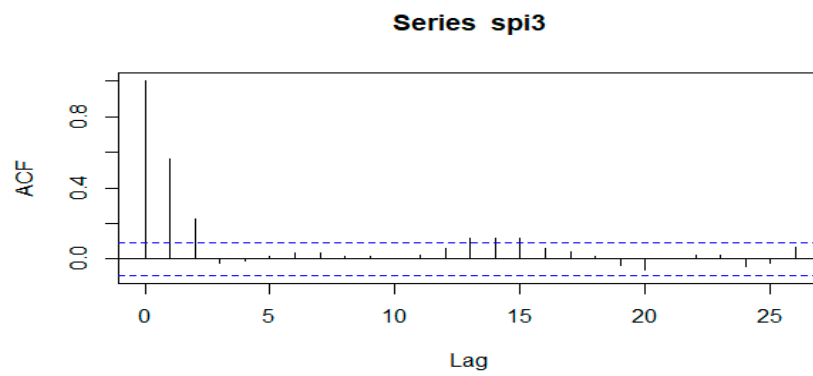

Figure S2. Partial Autocorrelation Function (PACF) plot of SPI3

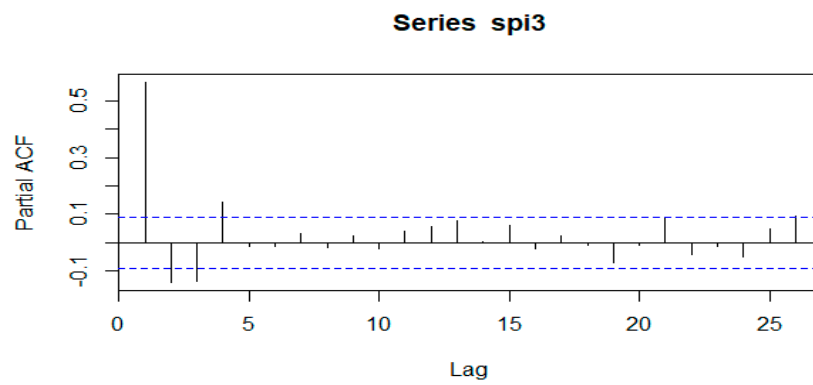

Figure S3. Autocorrelation Function (ACF) plot of SPI36

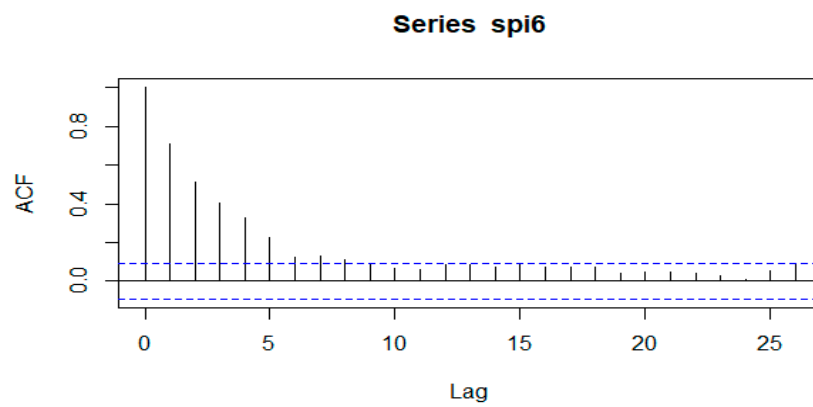

Figure S4. Partial Autocorrelation Function (PACF) plot of SPI6

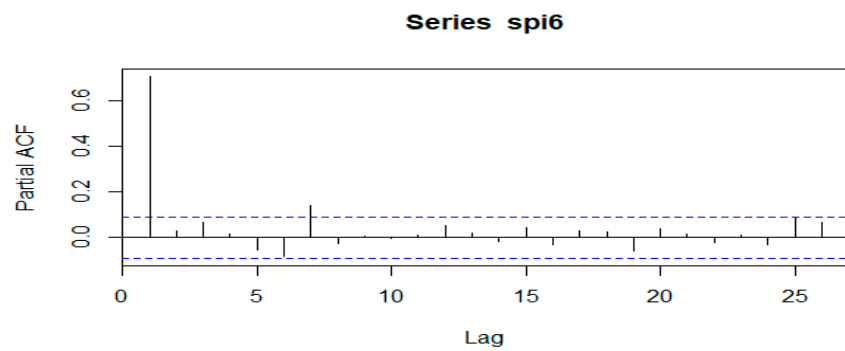

Supplement: s1 [file s1]
