# Supplementary material
Source: MDPI journal article supplement (https://www.mdpi.com/2071-1050/14/11/6690)
Supplement: s1 [file s1]

Archive with 3 entries (3 files):
- Supl. Fig. S1-S4 ACF and PACF plots of SPI3 and SPI6.pdf
- Supl. Table S1 Calculated SPI3 and SPI6.xlsx
- Supl. Table S2 Actual vs Fitted SPI.xlsx
