# Supplementary material
Source: MDPI journal article supplement (https://www.mdpi.com/2071-1050/14/11/6690)
Supplement: s1 [file s1 › Supl. Table S1 Calculated SPI3 and SPI6.xlsx]

## Sheet: Calculated SPI3
Year	SPI3
1982-03-01	0.0255139
1982-04-01	-0.0854103
1982-05-01	-0.606901
1982-06-01	-0.655689
1982-07-01	-0.882883
1982-08-01	-0.792418
1982-09-01	-0.895221
1982-10-01	-1.21877
1982-11-01	0.106439
1982-12-01	0.633451
1983-01-01	-1.56
1983-02-01	-2.04
1983-03-01	-2.25
1983-04-01	-3.15
1983-05-01	-2.13
1983-06-01	1.04983
1983-07-01	0.611794
1983-08-01	-0.670389
1983-09-01	-1.30161
1983-10-01	-1.48511
1983-11-01	-0.882688
1983-12-01	-0.877394
1984-01-01	-0.284749
1984-02-01	-0.52915
1984-03-01	-0.565285
1984-04-01	-0.954571
1984-05-01	-0.900818
1984-06-01	-1.56
1984-07-01	-1.23
1984-08-01	-1.89
1984-09-01	-0.476415
1984-10-01	0.757083
1984-11-01	1.62314
1984-12-01	1.60831
1985-01-01	1.15702
1985-02-01	1.07094
1985-03-01	0.817265
1985-04-01	-0.0601119
1985-05-01	-0.670616
1985-06-01	0.169534
1985-07-01	0.803085
1985-08-01	0.705071
1985-09-01	0.363487
1985-10-01	-0.644372
1985-11-01	-0.674775
1985-12-01	-1.15
1986-01-01	-0.85684
1986-02-01	-0.815212
1986-03-01	-0.595872
1986-04-01	1.194
1986-05-01	1.01056
1986-06-01	1.50436
1986-07-01	1.53803
1986-08-01	1.04987
1986-09-01	0.0854538
1986-10-01	-0.635598
1986-11-01	-0.273662
1986-12-01	-0.492573
1987-01-01	-0.050988
1987-02-01	-0.300228
1987-03-01	0.476708
1987-04-01	-0.0575951
1987-05-01	0.000675991
1987-06-01	-0.471947
1987-07-01	-0.395082
1987-08-01	0.433079
1987-09-01	0.102242
1987-10-01	0.105133
1987-11-01	0.386599
1987-12-01	0.582386
1988-01-01	0.729143
1988-02-01	-0.015988
1988-03-01	0.672705
1988-04-01	0.811672
1988-05-01	-0.353491
1988-06-01	0.568296
1988-07-01	1.01207
1988-08-01	1.80027
1988-09-01	1.58425
1988-10-01	0.262499
1988-11-01	-0.796519
1988-12-01	-1.30003
1989-01-01	-1.19572
1989-02-01	-1.43951
1989-03-01	-0.849815
1989-04-01	-1.22159
1989-05-01	-0.507729
1989-06-01	0.237441
1989-07-01	1.9419
1989-08-01	1.94673
1989-09-01	1.59569
1989-10-01	-0.960517
1989-11-01	-1.08549
1989-12-01	-1.34991
1990-01-01	-1.3435
1990-02-01	-1.64577
1990-03-01	-1.78436
1990-04-01	-1.17649
1990-05-01	1.53105
1990-06-01	2.24418
1990-07-01	2.09844
1990-08-01	1.32609
1990-09-01	0.946891
1990-10-01	0.722507
1990-11-01	1.13863
1990-12-01	0.552681
1991-01-01	0.633945
1991-02-01	-1.51557
1991-03-01	2.43654
1991-04-01	2.60422
1991-05-01	2.47777
1991-06-01	-0.905751
1991-07-01	0.981212
1991-08-01	1.24321
1991-09-01	0.738549
1991-10-01	0.0581638
1991-11-01	-0.409456
1991-12-01	0.16231
1992-01-01	-0.343844
1992-02-01	-0.422865
1992-03-01	-2.06
1992-04-01	-0.727852
1992-05-01	-0.349123
1992-06-01	-1.38915
1992-07-01	-1.11234
1992-08-01	-1.49327
1992-09-01	-0.512647
1992-10-01	-0.579286
1992-11-01	-0.440423
1992-12-01	0.14528
1993-01-01	0.708606
1993-02-01	-2.04
1993-03-01	0.066296
1993-04-01	0.149485
1993-05-01	-0.623098
1993-06-01	-1.1238
1993-07-01	-1.71474
1993-08-01	-0.96844
1993-09-01	-0.93907
1993-10-01	-0.336757
1993-11-01	0.100035
1993-12-01	0.516825
1994-01-01	0.920587
1994-02-01	0.567886
1994-03-01	0.0255139
1994-04-01	-0.0854103
1994-05-01	-0.606901
1994-06-01	-0.655689
1994-07-01	-0.882883
1994-08-01	-0.792418
1994-09-01	-0.895221
1994-10-01	-0.218771
1994-11-01	0.106439
1994-12-01	0.633451
1995-01-01	1.56222
1995-02-01	1.42706
1995-03-01	1.27932
1995-04-01	0.758741
1995-05-01	0.970415
1995-06-01	0.509258
1995-07-01	0.385787
1995-08-01	0.366686
1995-09-01	0.425771
1995-10-01	0.46445
1995-11-01	1.10524
1995-12-01	1.48862
1996-01-01	1.7426
1996-02-01	1.08688
1996-03-01	0.246897
1996-04-01	0.391103
1996-05-01	-0.00115426
1996-06-01	-0.367489
1996-07-01	-0.6892
1996-08-01	-0.446635
1996-09-01	0.411793
1996-10-01	0.851208
1996-11-01	0.947871
1996-12-01	0.601598
1997-01-01	0.767004
1997-02-01	1.5981
1997-03-01	1.60416
1997-04-01	1.29173
1997-05-01	1.04983
1997-06-01	0.611794
1997-07-01	-0.670389
1997-08-01	-1.30161
1997-09-01	-1.48511
1997-10-01	-0.882688
1997-11-01	-0.877394
1997-12-01	-0.284749
1998-01-01	-0.52915
1998-02-01	-0.565285
1998-03-01	-0.954571
1998-04-01	-0.900818
1998-05-01	-1.60635
1998-06-01	-1.00107
1998-07-01	-1.9206
1998-08-01	-0.476415
1998-09-01	0.757083
1998-10-01	1.62314
1998-11-01	1.60831
1998-12-01	1.15702
1999-01-01	1.07094
1999-02-01	0.817265
1999-03-01	-0.0601119
1999-04-01	-0.670616
1999-05-01	0.169534
1999-06-01	0.803085
1999-07-01	0.705071
1999-08-01	0.363487
1999-09-01	-0.644372
1999-10-01	-0.674775
1999-11-01	-1.14696
1999-12-01	-0.85684
2000-01-01	-0.815212
2000-02-01	-0.595872
2000-03-01	0.41093
2000-04-01	-0.246149
2000-05-01	0.377237
2000-06-01	0.0518262
2000-07-01	1.29523
2000-08-01	1.06146
2000-09-01	1.76055
2000-10-01	0.790149
2000-11-01	0.265246
2000-12-01	-0.963083
2001-01-01	-0.947666
2001-02-01	-0.844625
2001-03-01	-0.344456
2001-04-01	0.283305
2001-05-01	0.246552
2001-06-01	0.0175424
2001-07-01	0.0584023
2001-08-01	-0.634693
2001-09-01	-0.767523
2001-10-01	-0.365428
2001-11-01	0.982353
2001-12-01	1.1709
2002-01-01	1.04327
2002-02-01	-0.0628881
2002-03-01	-0.142104
2002-04-01	-0.521331
2002-05-01	-0.507053
2002-06-01	-0.371008
2002-07-01	-0.159915
2002-08-01	-0.783365
2002-09-01	-0.988509
2002-10-01	-1.26547
2002-11-01	-0.534285
2002-12-01	-0.555646
2003-01-01	0.00353725
2003-02-01	-1.37967
2003-03-01	-0.879949
2003-04-01	-0.165602
2003-05-01	-0.551198
2003-06-01	-1.48566
2003-07-01	-1.67971
2003-08-01	-0.209205
2003-09-01	1.06437
2003-10-01	1.02644
2003-11-01	0.416719
2003-12-01	-0.244139
2004-01-01	0.147619
2004-02-01	0.627793
2004-03-01	0.498689
2004-04-01	0.756979
2004-05-01	1.30252
2004-06-01	1.3371
2004-07-01	0.697637
2004-08-01	0.0193401
2004-09-01	-1.15732
2004-10-01	-0.933835
2004-11-01	-1.13375
2004-12-01	-0.3173
2005-01-01	-0.134664
2005-02-01	-0.585997
2005-03-01	0.223741
2005-04-01	0.742487
2005-05-01	0.848312
2005-06-01	0.125595
2005-07-01	-0.384087
2005-08-01	0.808729
2005-09-01	0.726854
2005-10-01	1.63182
2005-11-01	1.56081
2005-12-01	1.88223
2006-01-01	1.68747
2006-02-01	0.741553
2006-03-01	1.194
2006-04-01	1.01056
2006-05-01	1.50436
2006-06-01	1.53803
2006-07-01	1.04987
2006-08-01	0.0854538
2006-09-01	-0.635598
2006-10-01	-0.273662
2006-11-01	-0.492573
2006-12-01	-0.050988
2007-01-01	-0.300228
2007-02-01	0.476708
2007-03-01	-2.08
2007-04-01	0.000675991
2007-05-01	-0.471947
2007-06-01	-0.395082
2007-07-01	0.433079
2007-08-01	0.102242
2007-09-01	0.105133
2007-10-01	0.386599
2007-11-01	0.582386
2007-12-01	0.729143
2008-01-01	-0.015988
2008-02-01	0.672705
2008-03-01	2.07337
2008-04-01	2.48154
2008-05-01	1.9416
2008-06-01	1.45074
2008-07-01	-0.571302
2008-08-01	-0.956623
2008-09-01	0.61582
2008-10-01	1.23719
2008-11-01	1.09717
2008-12-01	-0.000157846
2009-01-01	-0.258567
2009-02-01	-0.442765
2009-03-01	-0.748659
2009-04-01	-0.593819
2009-05-01	-0.39891
2009-06-01	-0.534467
2009-07-01	-0.491208
2009-08-01	-0.241053
2009-09-01	-0.390112
2009-10-01	0.193143
2009-11-01	0.909104
2009-12-01	0.530589
2010-01-01	0.45083
2010-02-01	0.0455738
2010-03-01	-0.999178
2010-04-01	-1.32181
2010-05-01	-1.67294
2010-06-01	-0.549764
2010-07-01	-0.325593
2010-08-01	0.994617
2010-09-01	1.64391
2010-10-01	1.94759
2010-11-01	1.23393
2010-12-01	0.955331
2011-01-01	0.885452
2011-02-01	1.53958
2011-03-01	1.26266
2011-04-01	0.702436
2011-05-01	0.444717
2011-06-01	-0.103052
2011-07-01	-0.830855
2011-08-01	-0.355813
2011-09-01	-0.24524
2011-10-01	-0.474436
2011-11-01	-1.18658
2011-12-01	-1.29444
2012-01-01	-0.11193
2012-02-01	-0.895837
2012-03-01	-0.342417
2012-04-01	-0.081157
2012-05-01	-0.299871
2012-06-01	-0.010895
2012-07-01	-0.335545
2012-08-01	0.419236
2012-09-01	0.415987
2012-10-01	0.00964975
2012-11-01	-0.555531
2012-12-01	-0.0342083
2013-01-01	-0.0285148
2013-02-01	-0.0617073
2013-03-01	0.132156
2013-04-01	0.516515
2013-05-01	0.309241
2013-06-01	0.146687
2013-07-01	0.245245
2013-08-01	0.788115
2013-09-01	0.37723
2013-10-01	0.698316
2013-11-01	1.21401
2013-12-01	1.65835
2014-01-01	1.66918
2014-02-01	1.28232
2014-03-01	1.5788
2014-04-01	1.02445
2014-05-01	1.05839
2014-06-01	0.28155
2014-07-01	-0.660606
2014-08-01	-0.571894
2014-09-01	-0.853366
2014-10-01	-0.623449
2014-11-01	-0.501942
2014-12-01	-0.741912
2015-01-01	-0.294174
2015-02-01	0.564939
2015-03-01	1.22485
2015-04-01	1.61521
2015-05-01	1.62158
2015-06-01	1.28744
2015-07-01	-2.25
2015-08-01	-0.64388
2015-09-01	-0.948795
2015-10-01	-0.786471
2015-11-01	-0.357293
2015-12-01	-0.433973
2016-01-01	-0.691251
2016-02-01	-0.660606
2016-03-01	-0.571894
2016-04-01	-0.853366
2016-05-01	0.00446496
2016-06-01	0.0895107
2016-07-01	0.521065
2016-08-01	0.210682
2016-09-01	-0.876294
2016-10-01	0.723182
2016-11-01	0.651653
2016-12-01	1.03196
2017-01-01	-0.346277
2017-02-01	-0.285256
2017-03-01	0.178042
2017-04-01	-0.433973
2017-05-01	-0.691251
2017-06-01	0.54091
2017-07-01	1.0741
2017-08-01	1.12087
2017-09-01	0.319043
2017-10-01	-0.769257
2017-11-01	-0.0487859
2017-12-01	-0.317532
2018-01-01	-2.08
2018-02-01	-2.49
2018-03-01	-0.0905336
2018-04-01	0.0276406
2018-05-01	0.145535
2018-06-01	0.697231
2018-07-01	0.51912
2018-08-01	0.262403
2018-09-01	-1.27724
2018-10-01	-1.97862
2018-11-01	-1.11
2018-12-01	-1.80901
2019-01-01	-1.12691
2019-02-01	0.20261
2019-03-01	-0.194425
2019-04-01	-0.282145
2019-05-01	-1.82
2019-06-01	-1.66
2019-07-01	-0.315369
2019-08-01	0.225281
2019-09-01	0.344391
2019-10-01	0.578932
2019-11-01	-0.31101
2019-12-01	-0.64424
2020-01-01	-0.311139
2020-02-01	-0.677311
2020-03-01	-0.468113
2020-04-01	-0.103821
2020-05-01	-0.252949
2020-06-01	0.917
2020-07-01	1.477
2020-08-01	0.133
2020-09-01	0.226
2020-10-01	0.279
2020-11-01	1.734
2020-12-01	1.142
2021-01-01	-0.342
2021-02-01	-0.636
2021-03-01	-0.853
2021-04-01	-0.138
2021-05-01	1.709

## Sheet: Calculated SPI6
Year	SPI6
1982-06-01	0.0794446
1982-07-01	-0.274097
1982-08-01	-0.547888
1982-09-01	-0.62706
1982-10-01	-0.672603
1982-11-01	-0.742276
1982-12-01	-1.11198
1983-01-01	-1.1756
1983-02-01	-1.0762
1983-03-01	-0.0466484
1983-04-01	0.225002
1983-05-01	-2.66
1983-06-01	-0.152257
1983-07-01	-0.445863
1983-08-01	-0.560179
1983-09-01	-0.6096
1983-10-01	-0.701268
1983-11-01	-0.794724
1983-12-01	-0.770039
1984-01-01	-0.708775
1984-02-01	-0.734345
1984-03-01	-0.582742
1984-04-01	-0.453327
1984-05-01	-0.497612
1984-06-01	-0.566026
1984-07-01	-0.738172
1984-08-01	-0.78041
1984-09-01	-0.746371
1984-10-01	-0.785088
1984-11-01	-0.798208
1984-12-01	-0.861742
1985-01-01	-0.824724
1985-02-01	-0.828181
1985-03-01	-0.0941346
1985-04-01	-0.789854
1985-05-01	-0.910059
1985-06-01	-1.3732
1985-07-01	-1.33076
1985-08-01	-1.35523
1985-09-01	-0.609458
1985-10-01	-0.329524
1985-11-01	-0.388149
1985-12-01	-0.383591
1986-01-01	0.653621
1986-02-01	0.495255
1986-03-01	0.520605
1986-04-01	0.56898
1986-05-01	0.582713
1986-06-01	0.671721
1986-07-01	0.37023
1986-08-01	0.492342
1986-09-01	0.372924
1986-10-01	-1.86273
1986-11-01	-1.53412
1986-12-01	0.229947
1987-01-01	1.31192
1987-02-01	1.09478
1987-03-01	1.14808
1987-04-01	1.32914
1987-05-01	1.35348
1987-06-01	1.41158
1987-07-01	1.12701
1987-08-01	1.35087
1987-09-01	1.55869
1987-10-01	1.03985
1987-11-01	1.48178
1987-12-01	0.653621
1988-01-01	0.495255
1988-02-01	0.520605
1988-03-01	0.56898
1988-04-01	0.582713
1988-05-01	0.671721
1988-06-01	0.37023
1988-07-01	0.410036
1988-08-01	-0.355994
1988-09-01	-0.589668
1988-10-01	-0.96
1988-11-01	0.56
1988-12-01	-0.99237
1989-01-01	-1.45049
1989-02-01	-1.01034
1989-03-01	-0.460081
1989-04-01	-0.628801
1989-05-01	-0.289262
1989-06-01	-0.0658708
1989-07-01	0.0794446
1989-08-01	-0.274097
1989-09-01	-0.547888
1989-10-01	-0.62706
1989-11-01	-0.672603
1989-12-01	-0.742276
1990-01-01	-1.11198
1990-02-01	-1.1756
1990-03-01	-1.0762
1990-04-01	-1.04665
1990-05-01	0.225002
1990-06-01	0.37889
1990-07-01	-0.152257
1990-08-01	-0.445863
1990-09-01	-0.560179
1990-10-01	-0.6096
1990-11-01	-0.701268
1990-12-01	-0.794724
1991-01-01	-0.770039
1991-02-01	-0.708775
1991-03-01	-0.734345
1991-04-01	-0.582742
1991-05-01	-2.42
1991-06-01	-0.497612
1991-07-01	-0.566026
1991-08-01	-0.738172
1991-09-01	-0.78041
1991-10-01	-0.746371
1991-11-01	-0.785088
1991-12-01	-0.798208
1992-01-01	-0.861742
1992-02-01	-0.824724
1992-03-01	-0.828181
1992-04-01	-0.0941346
1992-05-01	-0.789854
1992-06-01	-0.910059
1992-07-01	-0.373198
1992-08-01	-0.330761
1992-09-01	-0.355229
1992-10-01	-0.297004
1992-11-01	-0.263712
1992-12-01	-0.204554
1993-01-01	-0.156055
1993-02-01	-0.11311
1993-03-01	-0.974868
1993-04-01	-0.768299
1993-05-01	-0.414688
1993-06-01	-0.873899
1993-07-01	1.194
1993-08-01	1.01056
1993-09-01	1.50436
1993-10-01	1.53803
1993-11-01	1.04987
1993-12-01	0.0854538
1994-01-01	-0.0768147
1994-02-01	-0.974764
1994-03-01	-0.797947
1994-04-01	-0.589316
1994-05-01	-0.566795
1994-06-01	-0.698932
1994-07-01	-0.689119
1994-08-01	-0.321413
1994-09-01	-0.626749
1994-10-01	0.205938
1994-11-01	1.57656
1994-12-01	1.76549
1995-01-01	1.5401
1995-02-01	1.20188
1995-03-01	1.15648
1995-04-01	0.636708
1995-05-01	-0.746401
1995-06-01	-0.454026
1995-07-01	-0.591559
1995-08-01	-0.618364
1995-09-01	-0.745785
1995-10-01	-0.736614
1995-11-01	-0.543283
1995-12-01	-0.576037
1996-01-01	-0.575668
1996-02-01	-0.552489
1996-03-01	-0.348365
1996-04-01	-0.0248793
1996-05-01	-0.789854
1996-06-01	-0.910059
1996-07-01	-1.36623
1996-08-01	-1.27586
1996-09-01	-1.07137
1996-10-01	-0.963929
1996-11-01	-0.925421
1996-12-01	-0.877597
1997-01-01	-0.802405
1997-02-01	-0.62144
1997-03-01	-0.528607
1997-04-01	-0.304992
1997-05-01	0.149068
1997-06-01	-0.113267
1997-07-01	-0.702604
1997-08-01	-0.877026
1997-09-01	-0.952383
1997-10-01	-0.925421
1997-11-01	-0.877597
1997-12-01	-0.981463
1998-01-01	-0.877125
1998-02-01	-0.906036
1998-03-01	-0.811874
1998-04-01	-0.334049
1998-05-01	-0.10133
1998-06-01	-0.615935
1998-07-01	0.205938
1998-08-01	1.57656
1998-09-01	1.76549
1998-10-01	1.5401
1998-11-01	0.02
1998-12-01	0.56
1999-01-01	-0.981331
1999-02-01	-0.960442
1999-03-01	-0.895838
1999-04-01	-0.709195
1999-05-01	-1.04759
1999-06-01	-0.662557
1999-07-01	1.43756
1999-08-01	1.97336
1999-09-01	1.90393
1999-10-01	1.84299
1999-11-01	1.69666
1999-12-01	1.66558
2000-01-01	0.682397
2000-02-01	-0.0740381
2000-03-01	-0.0370171
2000-04-01	-0.932636
2000-05-01	-0.427227
2000-06-01	-0.431212
2000-07-01	-0.735593
2000-08-01	-0.972761
2000-09-01	-0.96
2000-10-01	-0.992386
2000-11-01	-0.904644
2000-12-01	-0.831019
2001-01-01	0.56
2001-02-01	-0.99237
2001-03-01	-1.45049
2001-04-01	-1.01034
2001-05-01	-0.460081
2001-06-01	-0.628801
2001-07-01	-0.823538
2001-08-01	-0.904644
2001-09-01	-0.831019
2001-10-01	-0.579823
2001-11-01	-0.200642
2001-12-01	0.00896083
2002-01-01	0.0429905
2002-02-01	-0.127148
2002-03-01	0.1724
2002-04-01	-0.755118
2002-05-01	-0.789854
2002-06-01	-0.591175
2002-07-01	-0.92029
2002-08-01	-1.21207
2002-09-01	-1.86
2002-10-01	-1.56
2002-11-01	0.98
2002-12-01	-1.98
2003-01-01	-1.72
2003-02-01	-1.23652
2003-03-01	-0.56
2003-04-01	-0.920757
2003-05-01	-0.663003
2003-06-01	-0.810337
2003-07-01	-0.514568
2003-08-01	-0.470916
2003-09-01	-0.29668
2003-10-01	-0.554338
2003-11-01	-0.207513
2003-12-01	0.111528
2004-01-01	-0.739118
2004-02-01	-0.929165
2004-03-01	-0.89
2004-04-01	-0.609458
2004-05-01	-0.329524
2004-06-01	-0.388149
2004-07-01	-0.383591
2004-08-01	0.653621
2004-09-01	0.495255
2004-10-01	0.520605
2004-11-01	0.56898
2004-12-01	0.582713
2005-01-01	0.671721
2005-02-01	0.37023
2005-03-01	0.492342
2005-04-01	0.372924
2005-05-01	-1.86273
2005-06-01	-1.53412
2005-07-01	0.229947
2005-08-01	1.31192
2005-09-01	1.09478
2005-10-01	1.14808
2005-11-01	1.32914
2005-12-01	1.35348
2006-01-01	1.41158
2006-02-01	1.12701
2006-03-01	1.35087
2006-04-01	1.55869
2006-05-01	1.03985
2006-06-01	1.48178
2006-07-01	1.22332
2006-08-01	1.16315
2006-09-01	1.16308
2006-10-01	1.08792
2006-11-01	0.922767
2006-12-01	0.869443
2007-01-01	0.891815
2007-02-01	0.837719
2007-03-01	0.674365
2007-04-01	0.0947201
2007-05-01	0.310158
2007-06-01	-1.53412
2007-07-01	0.818742
2007-08-01	0.577832
2007-09-01	0.827772
2007-10-01	0.988452
2007-11-01	0.90503
2007-12-01	0.964792
2008-01-01	0.84109
2008-02-01	0.995297
2008-03-01	1.04499
2008-04-01	1.46657
2008-05-01	2.06999
2008-06-01	1.82835
2008-07-01	1.45026
2008-08-01	1.06898
2008-09-01	1.54225
2008-10-01	1.28587
2008-11-01	1.18873
2008-12-01	1.25842
2009-01-01	1.33508
2009-02-01	1.5439
2009-03-01	0.915135
2009-04-01	0.443875
2009-05-01	0.774884
2009-06-01	0.139326
2009-07-01	0.205799
2009-08-01	0.0514879
2009-09-01	0.714998
2009-10-01	0.772563
2009-11-01	0.787906
2009-12-01	0.822739
2010-01-01	0.885786
2010-02-01	1.11685
2010-03-01	0.856899
2010-04-01	0.831027
2010-05-01	0.569796
2010-06-01	0.336868
2010-07-01	0.847611
2010-08-01	1.37705
2010-09-01	1.41855
2010-10-01	1.30261
2010-11-01	1.24764
2010-12-01	1.28922
2011-01-01	1.29807
2011-02-01	-2.2
2011-03-01	-1.85
2011-04-01	0.856253
2011-05-01	1.01003
2011-06-01	0.481743
2011-07-01	-0.0748019
2011-08-01	0.603644
2011-09-01	0.810854
2011-10-01	0.644077
2011-11-01	0.648974
2011-12-01	0.676767
2012-01-01	0.77905
2012-02-01	0.640399
2012-03-01	0.152701
2012-04-01	0.288154
2012-05-01	0.250871
2012-06-01	-0.0709889
2012-07-01	0.860624
2012-08-01	1.24496
2012-09-01	1.03333
2012-10-01	0.957614
2012-11-01	0.951936
2012-12-01	1.05326
2013-01-01	0.971128
2013-02-01	0.718503
2013-03-01	0.89779
2013-04-01	1.06085
2013-05-01	1.43548
2013-06-01	0.946946
2013-07-01	1.22584
2013-08-01	1.31192
2013-09-01	1.09006
2013-10-01	1.06638
2013-11-01	1.21563
2013-12-01	1.24052
2014-01-01	1.20005
2014-02-01	1.13238
2014-03-01	1.31295
2014-04-01	1.84779
2014-05-01	1.00801
2014-06-01	1.12481
2014-07-01	0.818742
2014-08-01	0.798155
2014-09-01	0.741226
2014-10-01	0.485788
2014-11-01	0.45905
2014-12-01	0.4469
2015-01-01	0.468686
2015-02-01	0.368212
2015-03-01	0.236029
2015-04-01	0.583752
2015-05-01	1.69162
2015-06-01	1.34549
2015-07-01	1.44575
2015-08-01	0.899786
2015-09-01	0.731831
2015-10-01	0.842925
2015-11-01	0.691129
2015-12-01	0.701994
2016-01-01	0.560244
2016-02-01	0.750063
2016-03-01	-2.66
2016-04-01	0.451712
2016-05-01	-0.242826
2016-06-01	1.46624
2016-07-01	1.36007
2016-08-01	1.29322
2016-09-01	1.05556
2016-10-01	1.49394
2016-11-01	1.40897
2016-12-01	1.25075
2017-01-01	1.27346
2017-02-01	1.29798
2017-03-01	1.59238
2017-04-01	0.177355
2017-05-01	0.093792
2017-06-01	0.780755
2017-07-01	1.39644
2017-08-01	1.2749
2017-09-01	1.32767
2017-10-01	1.22559
2017-11-01	1.41425
2017-12-01	1.36516
2018-01-01	1.2632
2018-02-01	1.31343
2018-03-01	1.2605
2018-04-01	1.55633
2018-05-01	0.516496
2018-06-01	1.02839
2018-07-01	0.934878
2018-08-01	0.682945
2018-09-01	0.672706
2018-10-01	0.63161
2018-11-01	-1.95
2018-12-01	-1.62
2019-01-01	-1.66
2019-02-01	0.597918
2019-03-01	0.58092
2019-04-01	0.653567
2019-05-01	1.26266
2019-06-01	1.19968
2019-07-01	0.954261
2019-08-01	0.610647
2019-09-01	0.702262
2019-10-01	1.0729
2019-11-01	1.08983
2019-12-01	1.09652
2020-01-01	1.13253
2020-02-01	1.33248
2020-03-01	1.50766
2020-04-01	1.18048
2020-05-01	0.665882
2020-06-01	0.85
2020-07-01	1.41
2020-08-01	0.12
2020-09-01	0.26
2020-10-01	0.4
2020-11-01	0.36
2020-12-01	0.32
2021-01-01	0.23
2021-02-01	1.64
2021-03-01	0.84
2021-04-01	-0.52
2021-05-01	1.49
