# Supplementary material
Source: MDPI journal article supplement (https://www.mdpi.com/2071-1050/14/11/6690)
Supplement: s1 [file s1 › Supl. Table S2 Actual vs Fitted SPI.xlsx]

## Sheet: SPI3
Month	SPI3	Actual	ARIMA	ANN	SVR
1988-09-01	1.58425	1.58425	1.33708	1.36412	1.48488
1988-10-01	0.262499	0.262499	1.04205	1.14756	1.05015
1988-11-01	-0.796519	-0.796519	-0.31568	-0.583652	-0.491735
1988-12-01	-1.30003	-1.30003	-1.09115	-0.968335	-1.3991
1989-01-01	-1.19572	-1.19572	-0.952291	-1.25564	-1.30894
1989-02-01	-1.43951	-1.43951	-0.760079	-0.933237	-0.941766
1989-03-01	-0.849815	-0.849815	-1.13116	-1.14336	-0.951927
1989-04-01	-1.22159	-1.22159	-0.487011	-0.449999	-0.573451
1989-05-01	-0.507729	-0.507729	-0.806334	-0.795987	-0.741061
1989-06-01	0.237441	0.237441	-0.367566	-0.192948	-0.117752
1989-07-01	1.9419	1.9419	0.677134	0.879174	0.921893
1989-08-01	1.94673	1.94673	1.95695	1.91885	1.85863
1989-09-01	1.59569	1.59569	1.46899	1.59475	1.67698
1989-10-01	-0.960517	-0.960517	0.711901	0.428829	0.733235
1989-11-01	-1.08549	-1.08549	-1.47114	-1.3778	-0.985869
1989-12-01	-1.34991	-1.34991	-1.1221	-0.92607	-1.20924
1990-01-01	-1.3435	-1.3435	-0.518106	-1.12183	-0.756297
1990-02-01	-1.64577	-1.64577	-1.18993	-1.29781	-1.02072
1990-03-01	-1.78436	-1.78436	-1.35698	-1.18179	-0.969164
1990-04-01	-1.17649	-1.17649	-1.22911	-1.27026	-1.07689
1990-05-01	1.53105	1.53105	-0.638289	-0.234195	-0.37082
1990-06-01	2.24418	2.24418	2.12002	2.07192	1.92709
1990-07-01	2.09844	2.09844	2.17415	2.16544	1.99912
1990-08-01	1.32609	1.32609	0.890174	0.873852	1.1393
1990-09-01	0.946891	0.946891	0.750934	0.664652	0.847631
1990-10-01	0.722507	0.722507	0.668697	0.525876	0.623571
1990-11-01	1.13863	1.13863	0.395777	0.477136	0.503381
1990-12-01	0.552681	0.552681	0.957566	0.913331	0.840623
1991-01-01	0.633945	0.633945	0.327302	0.292474	0.35863
1991-02-01	-1.51557	-1.51557	0.230582	0.046061	0.349685
1991-03-01	-2.43654	-2.43654	-1.62499	-1.95975	-1.62343
1991-04-01	-2.60422	-2.60422	-2.46448	-2.39268	-2.24561
1991-05-01	-2.47777	-2.47777	-1.57847	-2.04872	-1.68479
1991-06-01	-0.905751	-0.905751	-1.64522	-1.55112	-0.93677
1991-07-01	0.981212	0.981212	-0.281226	0.32614	0.740957
1991-08-01	1.24321	1.24321	1.67692	1.52039	1.14406
1991-09-01	0.738549	0.738549	0.92936	0.917544	0.838024
1991-10-01	0.0581638	0.0581638	-0.0302045	0.0262828	0.116676
1991-11-01	-0.409456	-0.409456	-0.0528766	-0.168069	0.102646
1991-12-01	0.16231	0.16231	-0.394818	-0.455252	-0.438126
1992-01-01	-0.343844	-0.343844	0.240408	0.0502758	0.0898198
1992-02-01	-0.422865	-0.422865	-0.228271	-0.444549	-0.141501
1992-03-01	-0.789468	-0.789468	-0.601134	-0.561363	-0.689813
1992-04-01	-0.727852	-0.727852	-0.544639	-0.514958	-0.637278
1992-05-01	-0.349123	-0.349123	-0.517255	-0.580465	-0.602072
1992-06-01	-1.38915	-1.38915	-0.109458	-0.122672	-0.242964
1992-07-01	-1.11234	-1.11234	-1.30179	-1.40115	-1.22145
1992-08-01	-1.49327	-1.49327	-0.985612	-0.805761	-0.988886
1992-09-01	-0.512647	-0.512647	-0.831167	-0.843875	-0.612394
1992-10-01	-0.579286	-0.579286	-0.242234	-0.205082	0.0280761
1992-11-01	-0.440423	-0.440423	-0.249468	-0.271315	-0.222812
1992-12-01	0.14528	0.14528	-0.460694	-0.464088	-0.332079
1993-01-01	0.708606	0.708606	0.374051	0.57628	0.60931
1993-02-01	1.60728	1.60728	0.831672	0.950988	1.06231
1993-03-01	0.066296	0.066296	1.35247	1.42973	1.44355
1993-04-01	0.149485	0.149485	-0.413926	-0.282682	-0.199749
1993-05-01	-0.623098	-0.623098	-0.270365	-0.240265	-0.420526
1993-06-01	-1.1238	-1.1238	-0.221103	-0.667522	-0.718375
1993-07-01	-1.71474	-1.71474	-1.24748	-1.44762	-1.41588
1993-08-01	-0.96844	-0.96844	-1.46102	-1.34014	-1.06736
1993-09-01	-0.93907	-0.93907	-0.312146	-0.405825	-0.731183
1993-10-01	-0.336757	-0.336757	-0.505166	-0.404092	-0.436306
1993-11-01	0.100035	0.100035	-0.312871	-0.264684	-0.166697
1993-12-01	0.516825	0.516825	0.424065	0.418975	0.462031
1994-01-01	0.920587	0.920587	0.496995	0.497764	0.747955
1994-02-01	0.567886	0.567886	0.716108	0.956197	0.887822
1994-03-01	0.0255139	0.0255139	0.349049	0.257974	0.427993
1994-04-01	-0.0854103	-0.0854103	-0.297097	-0.276498	-0.354316
1994-05-01	-0.606901	-0.606901	-0.0839447	-0.197707	-0.305337
1994-06-01	-0.655689	-0.655689	-0.494767	-0.633685	-0.808324
1994-07-01	-0.882883	-0.882883	-0.644399	-0.600806	-0.69073
1994-08-01	-0.792418	-0.792418	-0.593309	-0.619806	-0.803792
1994-09-01	-0.895221	-0.895221	-0.569909	-0.626579	-0.808999
1994-10-01	-1.21877	-1.21877	-0.661995	-0.58668	-0.779141
1994-11-01	0.106439	0.106439	-1.01528	-0.960656	-0.966502
1994-12-01	0.633451	0.633451	0.506772	0.519232	0.689311
1995-01-01	1.56222	1.56222	0.951333	1.14839	1.15795
1995-02-01	1.42706	1.42706	1.12884	1.29071	1.09033
1995-03-01	1.27932	1.27932	1.10097	1.2041	1.1799
1995-04-01	0.758741	0.758741	0.762736	0.603369	0.748802
1995-05-01	0.970415	0.970415	0.369381	0.477783	0.276128
1995-06-01	0.509258	0.509258	0.75217	0.674494	0.607421
1995-07-01	0.385787	0.385787	0.337971	0.296966	0.238927
1995-08-01	0.366686	0.366686	0.0442996	-0.018039	0.0541526
1995-09-01	0.425771	0.425771	0.369687	0.290376	0.372885
1995-10-01	0.46445	0.46445	0.362476	0.30092	0.323946
1995-11-01	1.10524	1.10524	0.283172	0.400701	0.526482
1995-12-01	1.48862	1.48862	1.03594	1.26243	1.26484
1996-01-01	1.7426	1.7426	1.32368	1.52601	1.64283
1996-02-01	1.08688	1.08688	1.21214	1.26117	1.4059
1996-03-01	0.246897	0.246897	0.556324	0.54249	0.463887
1996-04-01	0.391103	0.391103	-0.209818	-0.379797	-0.556175
1996-05-01	-0.00115426	-0.00115426	0.354602	0.221169	0.0705551
1996-06-01	-0.367489	-0.367489	0.0583053	-0.213919	-0.220021
1996-07-01	-0.6892	-0.6892	-0.617939	-0.557906	-0.346555
1996-08-01	-0.446635	-0.446635	-0.553325	-0.539601	-0.546174
1996-09-01	0.411793	0.411793	-0.15649	-0.282526	-0.450653
1996-10-01	0.851208	0.851208	0.611877	0.558678	0.49203
1996-11-01	0.947871	0.947871	0.820991	0.893291	0.768528
1996-12-01	0.601598	0.601598	0.602069	0.506241	0.505815
1997-01-01	0.767004	0.767004	0.299751	0.301838	0.337864
1997-02-01	1.5981	1.5981	0.593985	0.825721	0.584065
1997-03-01	1.60416	1.60416	1.53658	1.66388	1.70347
1997-04-01	1.29173	1.29173	1.21253	1.33275	1.43128
1997-05-01	1.04983	1.04983	0.597157	0.61504	0.641736
1997-06-01	0.611794	0.611794	0.728854	0.665663	0.512112
1997-07-01	-0.670389	-0.670389	0.36675	0.165871	0.103123
1997-08-01	-1.30161	-1.30161	-1.03963	-1.01275	-1.14473
1997-09-01	-1.48511	-1.48511	-1.26722	-1.24169	-1.2705
1997-10-01	-0.882688	-0.882688	-0.899337	-1.15766	-1.24383
1997-11-01	-0.877394	-0.877394	-0.444596	-0.416175	-0.760197
1997-12-01	-0.284749	-0.284749	-0.592165	-0.501087	-0.630624
1998-01-01	-0.52915	-0.52915	-0.111856	-0.230836	-0.136898
1998-02-01	-0.565285	-0.565285	-0.308991	-0.316369	-0.124757
1998-03-01	-0.954571	-0.954571	-0.604104	-0.561702	-0.138512
1998-04-01	-0.900818	-0.900818	-0.742514	-0.652732	-0.393332
1998-05-01	-1.60635	-1.60635	-0.65017	-0.675718	-0.430199
1998-06-01	-2.00107	-2.00107	-1.34768	-1.37386	-1.25413
1998-07-01	-1.9206	-1.9206	-1.72606	-1.61659	-1.46998
1998-08-01	-0.476415	-0.476415	-1.2297	-1.00264	-0.904183
1998-09-01	0.757083	0.757083	0.232983	0.483123	0.657702
1998-10-01	1.62314	1.62314	1.10086	1.27988	1.34034
1998-11-01	1.60831	1.60831	1.32048	1.48695	1.50882
1998-12-01	1.15702	1.15702	1.12497	1.07981	1.09187
1999-01-01	1.07094	1.07094	0.613782	0.527867	0.734334
1999-02-01	0.817265	0.817265	0.714612	0.802232	0.714334
1999-03-01	-0.0601119	-0.0601119	0.603875	0.585305	0.415488
1999-04-01	-0.670616	-0.670616	-0.431569	-0.478746	-0.571127
1999-05-01	0.169534	0.169534	-0.798772	-0.722594	-0.863768
1999-06-01	0.803085	0.803085	0.560843	0.293145	0.224657
1999-07-01	0.705071	0.705071	0.998717	0.878054	0.984261
1999-08-01	0.363487	0.363487	0.24251	0.254962	0.317997
1999-09-01	-0.644372	-0.644372	0.0701418	-0.018895	-0.0669143
1999-10-01	-0.674775	-0.674775	-0.698391	-0.597961	-0.641336
1999-11-01	-1.14696	-1.14696	-0.649777	-0.653353	-0.945896
1999-12-01	-0.85684	-0.85684	-0.781338	-0.954616	-0.956346
2000-01-01	-0.815212	-0.815212	-0.648279	-0.634362	-0.915009
2000-02-01	-0.595872	-0.595872	-0.456372	-0.386043	-0.666944
2000-03-01	0.41093	0.41093	-0.402003	-0.418003	-0.385776
2000-04-01	-0.246149	-0.246149	0.651877	0.617774	0.799871
2000-05-01	0.377237	0.377237	-0.2484	-0.13556	0.0280814
2000-06-01	0.0518262	0.0518262	0.103555	0.131456	0.0476835
2000-07-01	1.29523	1.29523	0.310251	0.564576	0.580249
2000-08-01	1.06146	1.06146	1.1395	1.13788	0.961721
2000-09-01	1.76055	1.76055	0.905933	1.21349	1.31147
2000-10-01	0.790149	0.790149	1.22315	1.07936	1.10833
2000-11-01	0.265246	0.265246	0.463397	0.496358	0.364912
2000-12-01	-0.963083	-0.963083	-0.286718	-0.458823	-0.547382
2001-01-01	-0.947666	-0.947666	-0.969935	-0.98537	-1.17071
2001-02-01	-0.844625	-0.844625	-0.752297	-0.91805	-1.21347
2001-03-01	-0.344456	-0.344456	-0.385957	-0.497501	-0.333363
2001-04-01	0.283305	0.283305	-0.139704	-0.239292	-0.399472
2001-05-01	0.246552	0.246552	0.443363	0.414928	0.147152
2001-06-01	0.0175424	0.0175424	0.206729	0.192674	0.271577
2001-07-01	0.0584023	0.0584023	-0.214931	-0.152766	-0.0883424
2001-08-01	-0.634693	-0.634693	0.0967685	0.156143	0.279307
2001-09-01	-0.767523	-0.767523	-0.60592	-0.634885	-0.604952
2001-10-01	-0.365428	-0.365428	-0.800279	-0.710328	-0.944429
2001-11-01	0.982353	0.982353	0.0551189	0.03772	-0.196742
2001-12-01	1.1709	1.1709	1.2476	1.20932	0.995363
2002-01-01	1.04327	1.04327	0.938703	1.08807	1.01397
2002-02-01	-0.0628881	-0.0628881	0.457339	0.256732	0.252511
2002-03-01	-0.142104	-0.142104	-0.3396	-0.36909	-0.241747
2002-04-01	-0.521331	-0.521331	-0.236967	-0.28258	-0.548029
2002-05-01	-0.507053	-0.507053	-0.310102	-0.550839	-0.611309
2002-06-01	-0.371008	-0.371008	-0.484573	-0.542759	-0.526884
2002-07-01	-0.159915	-0.159915	-0.167816	-0.232952	-0.208811
2002-08-01	-0.783365	-0.783365	0.00661537	-0.253873	-0.195422
2002-09-01	-0.988509	-0.988509	-0.820233	-0.71831	-0.880245
2002-10-01	-1.26547	-1.26547	-0.920114	-0.8686	-0.845802
2002-11-01	-0.534285	-0.534285	-0.828264	-0.81756	-0.792781
2002-12-01	-0.555646	-0.555646	-0.189835	-0.183945	-0.179724
2003-01-01	0.00353725	0.00353725	-0.281137	-0.297549	-0.334304
2003-02-01	-1.37967	-1.37967	0.0200363	-0.271957	0.0207183
2003-03-01	-0.879949	-0.879949	-1.31802	-1.09792	-0.780302
2003-04-01	-0.165602	-0.165602	-0.802395	-0.589837	-0.264804
2003-05-01	-0.551198	-0.551198	0.590103	0.31471	0.598065
2003-06-01	-1.48566	-1.48566	-0.618583	-0.936164	-0.572839
2003-07-01	-1.67971	-1.67971	-1.73993	-1.31569	-1.58052
2003-08-01	-0.209205	-0.209205	-1.1057	-1.00566	-0.558845
2003-09-01	1.06437	1.06437	0.541175	0.59541	0.686136
2003-10-01	1.02644	1.02644	1.29519	1.41503	1.16349
2003-11-01	0.416719	0.416719	0.555541	0.547458	0.51603
2003-12-01	-0.244139	-0.244139	-0.0653837	-0.124846	-0.144644
2004-01-01	0.147619	0.147619	-0.324819	-0.266636	0.07043
2004-02-01	0.627793	0.627793	0.251832	0.158936	-0.0636355
2004-03-01	0.498689	0.498689	0.749926	0.576243	0.807998
2004-04-01	0.756979	0.756979	0.24189	0.20139	0.46504
2004-05-01	1.30252	1.30252	0.513262	0.684576	0.581993
2004-06-01	1.3371	1.3371	1.30097	1.42972	1.43648
2004-07-01	0.697637	0.697637	0.968457	1.11345	1.25274
2004-08-01	0.0193401	0.0193401	0.112826	0.0942157	0.118726
2004-09-01	-1.15732	-1.15732	-0.229206	-0.393522	-0.672303
2004-10-01	-0.933835	-0.933835	-1.16482	-1.2052	-1.61272
2004-11-01	-1.13375	-1.13375	-0.726771	-0.772195	-0.995782
2004-12-01	-0.3173	-0.3173	-0.600229	-0.750256	-0.701809
2005-01-01	-0.134664	-0.134664	-0.132888	-0.16603	-0.374494
2005-02-01	-0.585997	-0.585997	0.124471	0.0348062	-0.0734744
2005-03-01	0.223741	0.223741	-0.691769	-0.438502	-0.537685
2005-04-01	0.742487	0.742487	0.330523	0.529411	0.538294
2005-05-01	0.848312	0.848312	1.05275	1.13096	1.21509
2005-06-01	0.125595	0.125595	0.4377	0.400898	0.460341
2005-07-01	-0.384087	-0.384087	-0.258154	-0.209134	-0.24365
2005-08-01	0.808729	0.808729	-0.432552	-0.319301	-0.533843
2005-09-01	0.726854	0.726854	1.06041	0.965379	0.835638
2005-10-01	1.63182	1.63182	0.732035	0.973019	0.941076
2005-11-01	1.56081	1.56081	1.09005	1.17513	1.17315
2005-12-01	1.88223	1.88223	1.40351	1.48514	1.42019
2006-01-01	1.68747	1.68747	1.29455	1.21966	1.20658
2006-02-01	0.741553	0.741553	1.17186	1.24304	0.907403
2006-03-01	1.194	1.194	0.181134	0.00915305	0.0322845
2006-04-01	1.01056	1.01056	0.885502	0.979778	0.853416
2006-05-01	1.50436	1.50436	0.990393	1.04953	0.759751
2006-06-01	1.53803	1.53803	0.997547	1.08665	1.08393
2006-07-01	1.04987	1.04987	1.23633	1.34192	1.1152
2006-08-01	0.0854538	0.0854538	0.553846	0.30376	0.459196
2006-09-01	-0.635598	-0.635598	-0.400294	-0.466605	-0.615013
2006-10-01	-0.273662	-0.273662	-0.695566	-0.725979	-1.18766
2006-11-01	-0.492573	-0.492573	0.0187792	-0.245911	-0.289249
2006-12-01	-0.050988	-0.050988	-0.310009	-0.416751	-0.182029
2007-01-01	-0.300228	-0.300228	-0.100544	-0.258797	-0.154361
2007-02-01	0.476708	0.476708	-0.108712	-0.101239	-0.283116
2007-03-01	-0.0575951	-0.0575951	0.476195	0.291512	0.450193
2007-04-01	0.000675991	0.000675991	-0.0576046	0.0982768	0.0999153
2007-05-01	-0.471947	-0.471947	-0.243003	-0.3168	-0.337221
2007-06-01	-0.395082	-0.395082	-0.317031	-0.210689	-0.296079
2007-07-01	0.433079	0.433079	-0.3402	-0.392105	-0.462683
2007-08-01	0.102242	0.102242	0.653666	0.597339	0.619937
2007-09-01	0.105133	0.105133	0.0930963	0.0822054	0.00523836
2007-10-01	0.386599	0.386599	-0.230046	-0.182286	-0.391871
2007-11-01	0.582386	0.582386	0.561426	0.744451	0.637532
2007-12-01	0.729143	0.729143	0.562311	0.558355	0.583344
2008-01-01	-0.015988	-0.015988	0.423876	0.561146	0.70188
2008-02-01	0.672705	0.672705	-0.217464	-0.248607	-0.315488
2008-03-01	2.07337	2.07337	0.607878	0.811518	0.554881
2008-04-01	2.48154	2.48154	2.26421	2.3208	2.17348
2008-05-01	1.9416	1.9416	1.92078	1.77212	1.70409
2008-06-01	1.45074	1.45074	0.908367	0.80063	0.660472
2008-07-01	-0.571302	-0.571302	0.902704	0.597919	0.459628
2008-08-01	-0.956623	-0.956623	-0.982576	-1.0664	-0.85722
2008-09-01	0.61582	0.61582	-1.18413	-0.817741	-0.413429
2008-10-01	1.23719	1.23719	1.42619	1.08749	0.583582
2008-11-01	1.09717	1.09717	1.3333	1.15758	0.997747
2008-12-01	-0.000157846	-0.000157846	0.229417	0.251495	0.110895
2009-01-01	-0.258567	-0.258567	-0.29272	-0.348891	-0.345074
2009-02-01	-0.442765	-0.442765	-0.252754	-0.349908	-0.331905
2009-03-01	-0.748659	-0.748659	-0.300582	-0.504921	-0.649307
2009-04-01	-0.593819	-0.593819	-0.695023	-0.744208	-0.693374
2009-05-01	-0.39891	-0.39891	-0.401161	-0.4262	-0.482674
2009-06-01	-0.534467	-0.534467	-0.098884	-0.225813	-0.300219
2009-07-01	-0.491208	-0.491208	-0.485777	-0.508022	-0.582031
2009-08-01	-1.24105	-1.24105	-0.415964	-0.433679	-0.440664
2009-09-01	-0.390112	-0.390112	-1.04511	-1.02787	-0.796412
2009-10-01	0.193143	0.193143	-0.151767	-0.00823816	-0.0354334
2009-11-01	0.909104	0.909104	0.667083	0.627946	0.682418
2009-12-01	0.530589	0.530589	0.732329	0.603327	0.630152
2010-01-01	0.45083	0.45083	0.227706	0.331381	0.239652
2010-02-01	0.0455738	0.0455738	0.207004	0.0717816	0.145149
2010-03-01	-0.999178	-0.999178	0.00871139	0.0118143	0.00944392
2010-04-01	-1.32181	-1.32181	-1.16767	-1.17526	-1.41251
2010-05-01	-1.67294	-1.67294	-1.17359	-1.14549	-1.36833
2010-06-01	-1.54976	-1.54976	-1.09166	-1.25332	-1.45031
2010-07-01	-0.325593	-0.325593	-1.17082	-1.11635	-1.25137
2010-08-01	0.994617	0.994617	0.223019	0.476596	0.416086
2010-09-01	1.64391	1.64391	1.38965	1.44433	1.55276
2010-10-01	1.94759	1.94759	1.27572	1.50679	1.59911
2010-11-01	1.23393	1.23393	1.37522	1.27389	1.28689
2010-12-01	0.955331	0.955331	0.727634	0.616617	0.883841
2011-01-01	0.885452	0.885452	0.421309	0.447835	0.430575
2011-02-01	1.53958	1.53958	0.746693	0.864798	0.565178
2011-03-01	1.26266	1.26266	1.36113	1.41707	1.20363
2011-04-01	0.702436	0.702436	0.852224	0.92296	0.908027
2011-05-01	0.444717	0.444717	0.113992	-0.0486915	0.0837987
2011-06-01	-0.103052	-0.103052	0.284669	0.212006	0.00503174
2011-07-01	-0.830855	-0.830855	-0.15606	-0.377457	-0.654178
2011-08-01	-0.355813	-0.355813	-0.995287	-0.89471	-0.955872
2011-09-01	-0.24524	-0.24524	-0.0838713	-0.208605	-0.198497
2011-10-01	-0.474436	-0.474436	0.130381	-0.122658	-0.100808
2011-11-01	-1.18658	-1.18658	-0.654015	-0.678352	-0.806161
2011-12-01	-1.29444	-1.29444	-1.13629	-0.953351	-1.19103
2012-01-01	-1.11193	-1.11193	-0.915978	-0.902172	-0.733785
2012-02-01	-0.895837	-0.895837	-0.650376	-0.576963	-0.635022
2012-03-01	-0.342417	-0.342417	-0.597649	-0.532393	-0.539544
2012-04-01	-0.081157	-0.081157	-0.0692766	-0.0871559	-0.0535341
2012-05-01	-0.299871	-0.299871	0.115368	0.0127957	0.280604
2012-06-01	-1.0109	-1.0109	-0.383605	-0.264629	-0.103969
2012-07-01	-0.335545	-0.335545	-1.03435	-0.747716	-0.480751
2012-08-01	0.419236	0.419236	-0.00949407	0.067348	0.232832
2012-09-01	0.415987	0.415987	0.828253	0.743713	0.77107
2012-10-01	0.00964975	0.00964975	0.147778	0.161438	-0.00236139
2012-11-01	-0.555531	-0.555531	-0.291407	-0.228787	-0.436299
2012-12-01	-0.0342083	-0.0342083	-0.492278	-0.328634	-0.165853
2013-01-01	-0.0285148	-0.0285148	0.136227	0.039498	0.0579938
2013-02-01	-0.0617073	-0.0617073	0.128646	-0.0100576	0.0734627
2013-03-01	0.132156	0.132156	-0.225496	-0.281263	-0.390567
2013-04-01	0.516515	0.516515	0.193003	0.313151	0.143
2013-05-01	0.309241	0.309241	0.604602	0.626231	0.643077
2013-06-01	0.146687	0.146687	0.105582	0.159406	0.202442
2013-07-01	0.245245	0.245245	-0.0701125	-0.0599003	-0.111526
2013-08-01	0.788115	0.788115	0.313886	0.321674	0.268001
2013-09-01	0.37723	0.37723	0.789147	0.889901	0.897691
2013-10-01	0.698316	0.698316	0.133844	0.228744	0.316369
2013-11-01	1.21401	1.21401	0.431767	0.459964	0.465305
2013-12-01	1.65835	1.65835	1.28676	1.47854	1.46788
2014-01-01	1.66918	1.66918	1.31686	1.43679	1.605
2014-02-01	1.28232	1.28232	1.09837	1.21032	1.21254
2014-03-01	1.5788	1.5788	0.794786	0.694731	0.644403
2014-04-01	1.02445	1.02445	1.21294	1.22984	1.05718
2014-05-01	1.05839	1.05839	0.670179	0.723082	0.564924
2014-06-01	0.28155	0.28155	0.557917	0.48272	0.638742
2014-07-01	-0.660606	-0.660606	0.106449	-0.058985	-0.0859503
2014-08-01	-1.57189	-1.57189	-0.94841	-0.951433	-1.28322
2014-09-01	-0.853366	-0.853366	-1.4673	-1.49297	-1.29734
2014-10-01	-0.623449	-0.623449	-0.279614	-0.441221	-0.850268
2014-11-01	-0.501942	-0.501942	-0.135891	-0.20258	-0.367779
2014-12-01	-0.741912	-0.741912	-0.586108	-0.557099	-0.751369
2015-01-01	-0.294174	-0.294174	-0.573885	-0.4736	-0.665857
2015-02-01	0.564939	0.564939	-0.0162563	-0.0975554	0.415283
2015-03-01	1.22485	1.22485	0.77487	0.922951	1.05648
2015-04-01	1.61521	1.61521	1.11755	1.30801	1.20994
2015-05-01	1.62158	1.62158	1.22641	1.25382	1.23723
2015-06-01	1.28744	1.28744	1.16401	1.12916	1.18795
2015-07-01	0.218247	0.218247	0.779897	0.74809	0.775432
2015-08-01	-1.64388	-1.64388	-0.252658	-0.451922	-0.572545
2015-09-01	-1.9488	-1.9488	-1.91608	-1.99478	-1.70572
2015-10-01	-1.78647	-1.78647	-1.57272	-1.65889	-1.60571
2015-11-01	-1.35729	-1.35729	-0.884239	-1.24559	-1.33093
2015-12-01	-1.31373	-1.31373	-0.933249	-0.935629	-0.771246
2016-01-01	-1.78946	-1.78946	-0.977086	-0.855524	-0.466982
2016-02-01	-1.65361	-1.65361	-1.43138	-1.41018	-1.38304
2016-03-01	-1.20539	-1.20539	-1.21826	-0.895326	-1.10638
2016-04-01	-1.35319	-1.35319	-0.567443	-0.380303	-0.510601
2016-05-01	-1.00446	-1.00446	-1.0221	-0.988934	-0.8236
2016-06-01	0.0895107	0.0895107	-0.769386	-0.51584	-0.734887
2016-07-01	0.521065	0.521065	0.63503	0.548903	0.637113
2016-08-01	0.210682	0.210682	0.613252	0.557266	0.952688
2016-09-01	-0.876294	-0.876294	-0.212083	-0.185345	-0.103367
2016-10-01	0.723182	0.723182	-1.01105	-0.40778	-0.286332
2016-11-01	0.651653	0.651653	1.06349	0.838752	0.79719
2016-12-01	1.03196	1.03196	0.908047	1.02692	0.932639
2017-01-01	-0.346277	-0.346277	0.304175	0.114977	0.237328
2017-02-01	-0.285256	-0.285256	-0.509324	-0.34135	-0.38466
2017-03-01	0.178042	0.178042	-0.350173	-0.395861	-0.425777
2017-04-01	-0.433973	-0.433973	0.52967	0.210643	0.335179
2017-05-01	-0.691251	-0.691251	-0.527938	-0.765264	-0.591809
2017-06-01	0.54091	0.54091	-0.880748	-0.51215	-0.79123
2017-07-01	1.0741	1.0741	1.06255	0.960133	0.897528
2017-08-01	1.12087	1.12087	1.19516	1.21342	1.22022
2017-09-01	0.319043	0.319043	0.438221	0.462858	0.418564
2017-10-01	-0.769257	-0.769257	0.000278688	-0.0777319	-0.0764426
2017-11-01	-1.04879	-1.04879	-0.923384	-0.87044	-0.949704
2017-12-01	-1.31753	-1.31753	-0.932015	-0.97643	-1.31444
2018-01-01	-0.909247	-0.909247	-0.857782	-1.07618	-1.12377
2018-02-01	-0.191874	-0.191874	-0.587824	-0.550954	-0.793564
2018-03-01	-0.0905336	-0.0905336	0.187391	0.250015	0.00918172
2018-04-01	0.0276406	0.0276406	0.0137547	-0.106831	0.0157032
2018-05-01	0.145535	0.145535	-0.105205	0.00602994	-0.0230958
2018-06-01	0.697231	0.697231	0.233713	0.356125	0.536681
2018-07-01	0.51912	0.51912	0.715855	0.841148	0.813432
2018-08-01	0.262403	0.262403	0.329081	0.43035	0.507704
2018-09-01	-1.27724	-1.27724	-0.0456337	-0.0886738	-0.112484
2018-10-01	-1.97862	-1.97862	-1.38171	-1.4397	-1.36585
2018-11-01	-2.11296	-2.11296	-1.86129	-1.8936	-2.01365
2018-12-01	-1.80901	-1.80901	-1.33698	-1.54001	-1.70956
2019-01-01	-1.12691	-1.12691	-1.15078	-1.15563	-1.02741
2019-02-01	0.20261	0.20261	-0.634412	-0.330671	0.103584
2019-03-01	-0.194425	-0.194425	0.691847	0.479989	0.725543
2019-04-01	-0.282145	-0.282145	-0.18634	-0.143076	-0.18268
2019-05-01	-0.740658	-0.740658	-0.620847	-0.417181	-0.353767
2019-06-01	-0.342861	-0.342861	-0.436664	-0.436664	0.357278
2019-07-01	-0.315369	-0.315369	-0.248861	-0.248861	0.174447
2019-08-01	0.225281	0.225281	-0.0810143	-0.0810143	-0.219801
2019-09-01	0.344391	0.344391	-0.0194234	-0.0194234	0.0765198
2019-10-01	0.578932	0.578932	0.00189485	0.00189485	0.401812
2019-11-01	-0.31101	-0.31101	0.00430775	0.00430775	0.411544
2019-12-01	-0.64424	-0.64424	0.0028455	0.0028455	-0.384146
2020-01-01	-1.31114	-1.31114	0.00123225	0.00123225	-0.80803
2020-02-01	-0.677311	-0.677311	0.000386705	0.000386705	-1.20128
2020-03-01	-0.468113	-0.468113	5.64201e-05	5.64201e-05	-0.706448
2020-04-01	-0.103821	-0.103821	-2.67602e-05	-2.67602e-05	-0.299061
2020-05-01	-0.252949	-0.252949	-2.90495e-05	-2.90495e-05	-0.27055

## Sheet: SPI6
Month	SPI6	ACTUAL	ARIMA	ANN	SVR
1981-12-01	0.4469	0.4469	0.581861	0.447312	0.503482
1982-01-01	0.468686	0.468686	0.56286	0.432409	0.502156
1982-02-01	0.368212	0.368212	0.570451	0.394916	0.451939
1982-03-01	0.236029	0.236029	0.485303	0.446997	0.407967
1982-04-01	0.583752	0.583752	0.374606	0.310775	0.303842
1982-05-01	1.69162	1.69162	0.630631	0.198226	0.650513
1982-06-01	1.34549	1.34549	1.47743	0.624866	1.44548
1982-07-01	1.44575	1.44575	1.22858	1.44517	1.34584
1982-08-01	0.899786	0.899786	1.31476	1.20069	1.00137
1982-09-01	0.731831	0.731831	0.90595	1.28366	1.11312
1982-10-01	0.842925	0.842925	0.776528	0.940406	0.94287
1982-11-01	0.691129	0.691129	0.858292	0.825353	0.741677
1982-12-01	0.701994	0.701994	0.740551	0.81388	0.602581
1983-01-01	0.560244	0.560244	0.744999	0.650142	0.563958
1983-02-01	0.750063	0.750063	0.632793	0.707952	0.586759
1983-03-01	0.926591	0.926591	0.772799	0.507268	0.71681
1983-04-01	0.451712	0.451712	0.906526	0.773284	0.867551
1983-05-01	-0.242826	-0.242826	0.54355	0.930884	0.418489
1983-06-01	1.46624	1.46624	0.00313196	0.386942	0.153597
1983-07-01	1.36007	1.36007	1.29578	0.429273	1.42129
1983-08-01	1.29322	1.29322	1.2277	1.28973	1.19308
1983-09-01	1.05556	1.05556	1.1868	1.151	0.955704
1983-10-01	1.49394	1.49394	1.01274	1.1741	1.36118
1983-11-01	1.40897	1.40897	1.35265	1.09321	1.46386
1983-12-01	1.25075	1.25075	1.29855	1.24112	1.21108
1984-01-01	1.27346	1.27346	1.18578	1.24951	1.17325
1984-02-01	1.29798	1.29798	1.20834	1.23649	1.21562
1984-03-01	1.59238	1.59238	1.23229	1.23273	1.28549
1984-04-01	0.177355	0.177355	1.46347	1.21056	1.23155
1984-05-01	0.093792	0.093792	0.387334	1.30732	0.502376
1984-06-01	0.780755	0.780755	0.306644	0.344977	0.681341
1984-07-01	1.39644	1.39644	0.817248	0.640374	1.04586
1984-08-01	1.2749	1.2749	1.28702	1.02969	1.17504
1984-09-01	1.32767	1.32767	1.20234	1.29159	1.22738
1984-10-01	1.22559	1.22559	1.24857	1.18335	1.18773
1984-11-01	1.41425	1.41425	1.17643	1.24763	1.31438
1984-12-01	1.36516	1.36516	1.32514	1.19477	1.38131
1985-01-01	1.2632	1.2632	1.29447	1.25685	1.21872
1985-02-01	-1.27299	-1.27299	-1.1797	-1.18286	-1.18186
1985-03-01	-1.33297	-1.33297	-1.21869	-1.13619	-1.18872
1985-04-01	-1.23652	-1.23652	-1.26901	-1.1587	-1.20439
1985-05-01	-1.23918	-1.23918	-1.2	-1.23085	-1.12093
1985-06-01	-0.920757	-0.920757	-1.20492	-1.13691	-1.09172
1985-07-01	-0.663003	-0.663003	-0.963173	-1.11338	-0.813345
1985-08-01	-0.810337	-0.810337	-0.761959	-0.837058	-0.570384
1985-09-01	-1.33264	-1.33264	-0.86727	-0.633647	-0.810944
1985-10-01	-1.11195	-1.11195	-1.26375	-0.888339	-1.21926
1985-11-01	-1.23337	-1.23337	-1.09976	-1.32724	-1.05743
1985-12-01	-1.26277	-1.26277	-1.19392	-1.07496	-1.11297
1986-01-01	-1.17699	-1.17699	-1.2196	-1.09591	-1.19795
1986-02-01	-1.16939	-1.16939	-1.15715	-1.2006	-1.12394
1986-03-01	-1.11327	-1.11327	-1.15288	-1.09242	-1.01343
1986-04-01	-1.16179	-1.16179	-1.1111	-1.06614	-1.02218
1986-05-01	-1.01604	-1.01604	-1.14852	-1.02684	-1.04399
1986-06-01	-0.609458	-0.609458	-1.03768	-1.08727	-0.912728
1986-07-01	-0.329524	-0.329524	-0.723843	-0.949504	-0.498745
1986-08-01	-0.388149	-0.388149	-0.499934	-0.558778	-0.342528
1986-09-01	-0.383591	-0.383591	-0.531516	-0.398134	-0.613871
1986-10-01	0.653621	0.653621	-0.516725	-0.531602	-0.607844
1986-11-01	0.495255	0.495255	0.290011	-0.472409	0.504146
1986-12-01	0.520605	0.520605	0.197077	0.704663	0.367284
1987-01-01	0.56898	0.56898	0.240024	0.413463	0.468972
1987-02-01	0.582713	0.582713	0.299262	0.548414	0.682632
1987-03-01	0.671721	0.671721	0.331049	0.558795	0.586685
1987-04-01	0.37023	0.37023	0.419201	0.573558	0.66718
1987-05-01	0.492342	0.492342	0.207643	0.683315	0.392344
1987-06-01	0.372924	0.372924	0.314193	0.294237	0.550149
1987-07-01	-1.86273	-1.86273	0.23655	0.499286	0.448532
1987-08-01	-1.53412	-1.53412	-1.46898	0.283193	-0.774035
1987-09-01	0.229947	0.229947	-1.24773	-1.14412	0.129731
1987-10-01	1.31192	1.31192	0.0839575	-0.234981	1.21187
1987-11-01	1.09478	1.09478	0.926071	0.955892	0.994905
1987-12-01	1.14808	1.14808	0.789766	1.03989	1.04811
1988-01-01	1.32914	1.32914	0.854706	0.944151	1.22937
1988-02-01	1.35348	1.35348	1.01681	1.10429	1.27536
1988-03-01	1.41158	1.41158	1.0601	1.18468	1.39262
1988-04-01	1.12701	1.12701	1.12781	1.22069	1.22677
1988-05-01	1.35087	1.35087	0.931705	1.27875	1.17399
1988-06-01	1.55869	1.55869	1.11894	1.15022	1.25426
1988-07-01	1.03985	1.03985	1.29675	1.24901	1.28506
1988-08-01	1.48178	1.48178	0.91908	1.30514	1.13243
1988-09-01	1.22332	1.22332	1.26785	1.06812	1.16787
1988-10-01	1.16315	1.16315	1.08629	1.27695	1.1914
1988-11-01	1.16308	1.16308	1.05089	1.1131	1.14006
1988-12-01	1.08792	1.08792	1.05968	1.1769	1.04989
1989-01-01	0.922767	0.922767	1.01012	1.12486	1.11395
1989-02-01	0.869443	0.869443	0.889466	1.07141	0.870388
1989-03-01	0.891815	0.891815	0.851154	0.960248	0.851814
1989-04-01	0.837719	0.837719	0.869769	0.879423	0.832408
1989-05-01	0.674365	0.674365	0.829977	0.878248	0.756159
1989-06-01	0.0947201	0.0947201	0.705183	0.830438	0.640712
1989-07-01	0.310158	0.310158	0.257773	0.652996	0.27971
1989-08-01	-1.53412	-1.53412	0.410317	0.191993	0.53399
1989-09-01	0.818742	0.818742	-1.01339	0.180149	-0.195125
1989-10-01	0.577832	0.577832	0.751842	0.120824	0.677885
1989-11-01	0.827772	0.827772	0.57217	0.690828	0.727689
1989-12-01	0.988452	0.988452	0.76449	0.682249	0.888844
1990-01-01	0.90503	0.90503	0.892825	0.800891	1.00496
1990-02-01	0.964792	0.964792	0.836316	0.977126	0.972422
1990-03-01	-1.13941	-1.13941	-0.863443	-1.02209	-1.03941
1990-04-01	-1.27302	-1.27302	-0.914241	-1.11544	-1.17332
1990-05-01	-1.3543	-1.3543	-1.04236	-1.09047	-1.25416
1990-06-01	-1.18933	-1.18933	-1.12665	-1.19542	-1.31174
1990-07-01	-0.859803	-0.859803	-1.01725	-1.26572	-1.09525
1990-08-01	-0.289262	-0.289262	-0.773626	-1.09464	-0.719575
1990-09-01	-0.0658708	-0.0658708	-0.338113	-0.754552	-0.225727
1990-10-01	0.0794446	0.0794446	-0.160348	-0.280895	-0.337783
1990-11-01	-0.274097	-0.274097	-0.0412415	-0.177592	-0.315381
1990-12-01	-0.547888	-0.547888	-0.304734	-0.0612756	-0.51372
1991-01-01	-0.62706	-0.62706	-0.513526	-0.461003	-0.680363
1991-02-01	-0.672603	-0.672603	-0.57751	-0.674075	-0.615539
1991-03-01	-0.742276	-0.742276	-0.616816	-0.684301	-0.71021
1991-04-01	-1.11198	-1.11198	-0.67563	-0.725097	-0.818513
1991-05-01	-1.1756	-1.1756	-0.965634	-0.807363	-1.18352
1991-06-01	-1.0762	-1.0762	-1.02633	-1.11597	-1.17811
1991-07-01	-1.04665	-1.04665	-0.961913	-1.1644	-1.02127
1991-08-01	0.225002	0.225002	-0.947328	-1.03331	-0.970765
1991-09-01	0.37889	0.37889	0.0222277	-0.96803	0.355323
1991-10-01	-0.152257	-0.152257	0.156384	0.351292	-0.0520956
1991-11-01	-0.445863	-0.445863	-0.234121	0.18653	-0.531
1991-12-01	-0.560179	-0.560179	-0.453214	-0.375176	-0.496892
1992-01-01	-0.6096	-0.6096	-0.540461	-0.47167	-0.583312
1992-02-01	-0.701268	-0.701268	-0.580015	-0.535047	-0.601206
1992-03-01	-0.794724	-0.794724	-0.652789	-0.669468	-0.764847
1992-04-01	-0.770039	-0.770039	-0.728396	-0.775718	-0.869801
1992-05-01	-0.708775	-0.708775	-0.714677	-0.861525	-0.802681
1992-06-01	-0.734345	-0.734345	-0.672016	-0.813825	-0.71227
1992-07-01	-0.582742	-0.582742	-0.694535	-0.728177	-0.760613
1992-08-01	-0.453327	-0.453327	-0.581259	-0.784407	-0.607647
1992-09-01	-0.497612	-0.497612	-0.482014	-0.625243	-0.486671
1992-10-01	-0.566026	-0.566026	-0.513757	-0.510081	-0.597281
1992-11-01	-0.738172	-0.738172	-0.565022	-0.605203	-0.692006
1992-12-01	-0.78041	-0.78041	-0.69727	-0.687845	-0.834003
1993-01-01	-0.746371	-0.746371	-0.732922	-0.837637	-0.839732
1993-02-01	-0.785088	-0.785088	-0.710536	-0.853682	-0.766654
1993-03-01	-0.798208	-0.798208	-0.743086	-0.779376	-0.809443
1993-04-01	-0.861742	-0.861742	-0.756472	-0.828159	-0.829262
1993-05-01	-0.824724	-0.824724	-0.808536	-0.848075	-0.875491
1993-06-01	-0.828181	-0.828181	-0.78431	-0.892761	-0.818641
1993-07-01	-1.09413	-1.09413	-0.790155	-0.851999	-0.818053
1993-08-01	-0.789854	-0.789854	-0.997319	-0.845343	-1.08487
1993-09-01	-0.910059	-0.910059	-0.771353	-1.08335	-0.754771
1993-10-01	-1.3732	-1.3732	-0.865098	-0.788806	-0.845745
1993-11-01	-1.33076	-1.33076	-1.22419	-0.886354	-1.29971
1993-12-01	-1.35523	-1.35523	-1.20335	-1.34636	-1.27062
1994-01-01	-1.297	-1.297	-1.23217	-1.2554	-1.22005
1994-02-01	-1.26371	-1.26371	-1.19717	-1.20457	-1.21536
1994-03-01	-1.20455	-1.20455	-1.17947	-1.17194	-1.19286
1994-04-01	-1.15605	-1.15605	-1.14069	-1.12797	-1.06022
1994-05-01	-1.11311	-1.11311	-1.10849	-1.08066	-1.02403
1994-06-01	-0.974868	-0.974868	-1.07927	-1.04443	-0.982737
1994-07-01	-0.768299	-0.768299	-0.975809	-1.01922	-0.868086
1994-08-01	-0.414688	-0.414688	-0.817155	-0.898787	-0.678204
1994-09-01	-0.873899	-0.873899	-0.541845	-0.733299	-0.400519
1994-10-01	-1.34583	-1.34583	-0.884359	-0.439788	-0.942607
1994-11-01	-1.38064	-1.38064	-1.24583	-0.999314	-1.28185
1994-12-01	-1.3634	-1.3634	-1.28043	-1.36822	-1.28429
1995-01-01	-1.257	-1.257	-1.27509	-1.30746	-1.26041
1995-02-01	-1.13935	-1.13935	-1.20036	-1.22566	-1.22257
1995-03-01	-1.15307	-1.15307	-1.11451	-1.11316	-1.07687
1995-04-01	-1.07681	-1.07681	-1.127	-1.00616	-1.01686
1995-05-01	-0.974764	-0.974764	-1.07051	-1.04283	-0.964676
1995-06-01	-0.797947	-0.797947	-0.992663	-1.00024	-0.856774
1995-07-01	-0.589316	-0.589316	-0.855514	-0.896773	-0.707362
1995-08-01	-0.566795	-0.566795	-0.690817	-0.765346	-0.566993
1995-09-01	-0.698932	-0.698932	-0.665533	-0.609453	-0.630233
1995-10-01	-1.40946	-1.40946	-0.759195	-0.657083	-0.802392
1995-11-01	-1.48274	-1.48274	-1.29991	-0.825438	-1.32114
1995-12-01	-1.43977	-1.43977	-1.36479	-1.32872	-1.38912
1996-01-01	-1.44951	-1.44951	-1.3411	-1.37712	-1.36052
1996-02-01	-1.26237	-1.26237	-1.35634	-1.2677	-1.36224
1996-03-01	-1.25247	-1.25247	-1.22002	-1.27087	-1.23691
1996-04-01	-1.19752	-1.19752	-1.21575	-1.1027	-1.07877
1996-05-01	-1.10952	-1.10952	-1.17646	-1.08334	-1.04497
1996-06-01	-0.985557	-0.985557	-1.11057	-1.08011	-0.969795
1996-07-01	-0.595959	-0.595959	-1.01532	-1.00347	-0.847358
1996-08-01	-1.12287	-1.12287	-0.713888	-0.899956	-0.515243
1996-09-01	-0.454026	-0.454026	-1.1091	-0.561306	-1.03655
1996-10-01	-0.591559	-0.591559	-0.596724	-1.10705	-0.491774
1996-11-01	-0.618364	-0.618364	-0.691066	-0.418498	-0.576895
1996-12-01	-0.745785	-0.745785	-0.703806	-0.590305	-0.686532
1997-01-01	-0.736614	-0.736614	-0.794894	-0.711739	-0.828696
1997-02-01	-0.543283	-0.543283	-0.783986	-0.810763	-0.746961
1997-03-01	-0.576037	-0.576037	-0.631837	-0.80567	-0.53669
1997-04-01	-0.575668	-0.575668	-0.650008	-0.547841	-0.617502
1997-05-01	-0.552489	-0.552489	-0.643897	-0.654875	-0.671231
1997-06-01	-0.348365	-0.348365	-0.620729	-0.668451	-0.631501
1997-07-01	-0.0248793	-0.0248793	-0.458651	-0.633929	-0.383889
1997-08-01	-0.789854	-0.789854	-0.201631	-0.394237	-0.0615367
1997-09-01	-0.910059	-0.910059	-0.774966	-0.119423	-0.9968
1997-10-01	-1.36623	-1.36623	-0.868418	-0.962819	-1.01049
1997-11-01	-1.27586	-1.27586	-1.22189	-1.00836	-1.27073
1997-12-01	-1.07137	-1.07137	-1.16388	-1.24866	-1.22823
1998-01-01	-0.963929	-0.963929	-1.01572	-1.21177	-1.06391
1998-02-01	-0.925421	-0.925421	-0.937625	-0.957923	-0.858388
1998-03-01	-0.877597	-0.877597	-0.910135	-0.871295	-0.906683
1998-04-01	-0.802405	-0.802405	-0.874625	-0.891721	-0.821905
1998-05-01	-0.62144	-0.62144	-0.817135	-0.859395	-0.751094
1998-06-01	-0.528607	-0.528607	-0.677052	-0.794877	-0.596171
1998-07-01	-0.304992	-0.304992	-0.601406	-0.636191	-0.560833
1998-08-01	0.149068	0.149068	-0.424006	-0.596342	-0.395517
1998-09-01	-0.113267	-0.113267	-0.0660577	-0.362457	0.0155281
1998-10-01	-0.702604	-0.702604	-0.250503	0.0690929	-0.32714
1998-11-01	-0.877026	-0.877026	-0.692117	-0.321317	-0.895025
1998-12-01	-0.952383	-0.952383	-0.826843	-0.837718	-0.852361
1999-01-01	-1.06464	-1.06464	-0.888646	-0.927172	-0.935958
1999-02-01	-1.04644	-1.04644	-0.979843	-0.969327	-1.14672
1999-03-01	-0.981463	-0.981463	-0.972552	-1.05771	-1.07779
1999-04-01	-0.877125	-0.877125	-0.92849	-1.0364	-0.92963
1999-05-01	-0.906036	-0.906036	-0.852564	-0.938933	-0.809998
1999-06-01	-0.811874	-0.811874	-0.876693	-0.832623	-0.867941
1999-07-01	-0.334049	-0.334049	-0.806718	-0.890484	-0.785642
1999-08-01	-0.10133	-0.10133	-0.440306	-0.812694	-0.288624
1999-09-01	-0.615935	-0.615935	-0.253282	-0.309261	-0.199966
1999-10-01	-1.73415	-1.73415	-0.636367	-0.199184	-0.874428
1999-11-01	-1.29362	-1.29362	-1.49319	-0.834434	-1.39331
1999-12-01	-1.21505	-1.21505	-1.17398	-1.30461	-1.1473
2000-01-01	-1.16618	-1.16618	-1.12309	-1.09572	-1.06643
2000-02-01	-1.07299	-1.07299	-1.09282	-0.991047	-1.09681
2000-03-01	-1.0669	-1.0669	-1.02705	-1.05617	-1.07024
2000-04-01	-0.981331	-0.981331	-1.026	-0.977979	-0.87742
2000-05-01	-0.960442	-0.960442	-0.963531	-0.984728	-0.886635
2000-06-01	-0.895838	-0.895838	-0.948897	-0.92358	-0.873184
2000-07-01	-0.709195	-0.709195	-0.900211	-0.903409	-0.828852
2000-08-01	-1.04759	-1.04759	-0.756584	-0.866908	-0.663148
2000-09-01	-0.662557	-0.662557	-1.01263	-0.696177	-1.00745
2000-10-01	-1.32616	-1.32616	-0.719802	-1.04721	-0.655674
2000-11-01	-1.29966	-1.29966	-1.22473	-0.696387	-1.20011
2000-12-01	-1.38855	-1.38855	-1.21237	-1.15911	-1.24834
2001-01-01	-1.30937	-1.30937	-1.28749	-1.27118	-1.28764
2001-02-01	-1.31431	-1.31431	-1.23467	-1.23204	-1.16171
2001-03-01	-1.36937	-1.36937	-1.24434	-1.19805	-1.26937
2001-04-01	-1.30576	-1.30576	-1.29212	-1.16802	-1.213
2001-05-01	-1.32502	-1.32502	-1.24937	-1.24294	-1.17665
2001-06-01	-1.0423	-1.0423	-1.2686	-1.19007	-1.15425
2001-07-01	-0.932636	-0.932636	-1.056	-1.18316	-0.923203
2001-08-01	-0.427227	-0.427227	-0.970739	-0.935281	-0.802693
2001-09-01	-0.431212	-0.431212	-0.579744	-0.839038	-0.388872
2001-10-01	-0.735593	-0.735593	-0.57079	-0.422189	-0.560683
2001-11-01	-0.972761	-0.972761	-0.793464	-0.549136	-0.897521
2001-12-01	-0.927523	-0.927523	-0.970974	-0.902372	-1.02768
2002-01-01	-0.992386	-0.992386	-0.936387	-1.06142	-0.915514
2002-02-01	-1.02181	-1.02181	-0.985483	-0.9535	-0.987261
2002-03-01	-1.04209	-1.04209	-1.00862	-0.965312	-1.02423
2002-04-01	-1.08172	-1.08172	-1.02523	-1.01638	-1.00769
2002-05-01	-0.99237	-0.99237	-1.05698	-1.01898	-1.00811
2002-06-01	-1.45049	-1.45049	-0.990331	-1.04923	-0.925573
2002-07-01	-1.01034	-1.01034	-1.34219	-0.952878	-1.29964
2002-08-01	-0.460081	-0.460081	-1.01282	-1.3144	-0.955061
2002-09-01	-0.628801	-0.628801	-0.5902	-0.930705	-0.262456
2002-10-01	-0.823538	-0.823538	-0.709474	-0.39106	-0.64969
2002-11-01	-1.1687	-1.1687	-0.852616	-0.759035	-1.00077
2002-12-01	-1.17669	-1.17669	-1.1153	-0.961806	-1.07684
2003-01-01	-1.2221	-1.2221	-1.12564	-1.17267	-1.12249
2003-02-01	-1.15505	-1.15505	-1.16452	-1.15344	-1.18934
2003-03-01	-1.14621	-1.14621	-1.11758	-1.13964	-1.09878
2003-04-01	-1.22474	-1.22474	-1.11375	-1.08282	-1.08186
2003-05-01	-1.07305	-1.07305	-1.17659	-1.05825	-1.10985
2003-06-01	-1.03047	-1.03047	-1.06394	-1.14698	-0.980553
2003-07-01	-0.755118	-0.755118	-1.03197	-1.0016	-0.904289
2003-08-01	-0.789854	-0.789854	-0.820464	-0.935032	-0.671385
2003-09-01	-0.591175	-0.591175	-0.841983	-0.721163	-0.760725
2003-10-01	-0.92029	-0.92029	-0.685354	-0.79642	-0.619338
2003-11-01	-1.21207	-1.21207	-0.930592	-0.638632	-0.940108
2003-12-01	-1.23845	-1.23845	-1.15378	-0.964881	-1.18825
2004-01-01	-1.28039	-1.28039	-1.17862	-1.24151	-1.18934
2004-02-01	-1.22706	-1.22706	-1.21553	-1.19137	-1.19359
2004-03-01	-1.27299	-1.27299	-1.1797	-1.18286	-1.18186
2004-04-01	-1.33297	-1.33297	-1.21869	-1.13619	-1.18872
2004-05-01	-1.23652	-1.23652	-1.26901	-1.1587	-1.20439
2004-06-01	-1.23918	-1.23918	-1.2	-1.23085	-1.12093
2004-07-01	-0.920757	-0.920757	-1.20492	-1.13691	-1.09172
2004-08-01	-0.663003	-0.663003	-0.963173	-1.11338	-0.813345
2004-09-01	-0.810337	-0.810337	-0.761959	-0.837058	-0.570384
2004-10-01	-1.33264	-1.33264	-0.86727	-0.633647	-0.810944
2004-11-01	-1.11195	-1.11195	-1.26375	-0.888339	-1.21926
2004-12-01	-1.23337	-1.23337	-1.09976	-1.32724	-1.05743
2005-01-01	-1.26277	-1.26277	-1.19392	-1.07496	-1.11297
2005-02-01	-1.17699	-1.17699	-1.2196	-1.09591	-1.19795
2005-03-01	-1.16939	-1.16939	-1.15715	-1.2006	-1.12394
2005-04-01	-1.11327	-1.11327	-1.15288	-1.09242	-1.01343
2005-05-01	-1.16179	-1.16179	-1.1111	-1.06614	-1.02218
2005-06-01	-1.01604	-1.01604	-1.14852	-1.02684	-1.04399
2005-07-01	-0.609458	-0.609458	-1.03768	-1.08727	-0.912728
2005-08-01	-0.329524	-0.329524	-0.723843	-0.949504	-0.498745
2005-09-01	-0.388149	-0.388149	-0.499934	-0.558778	-0.342528
2005-10-01	-0.383591	-0.383591	-0.531516	-0.398134	-0.613871
2005-11-01	0.653621	0.653621	-0.516725	-0.531602	-0.607844
2005-12-01	0.495255	0.495255	0.290011	-0.472409	0.504146
2006-01-01	0.520605	0.520605	0.197077	0.704663	0.367284
2006-02-01	0.56898	0.56898	0.240024	0.413463	0.468972
2006-03-01	0.582713	0.582713	0.299262	0.548414	0.682632
2006-04-01	0.671721	0.671721	0.331049	0.558795	0.586685
2006-05-01	0.37023	0.37023	0.419201	0.573558	0.66718
2006-06-01	0.492342	0.492342	0.207643	0.683315	0.392344
2006-07-01	0.372924	0.372924	0.314193	0.294237	0.550149
2006-08-01	-1.86273	-1.86273	0.23655	0.499286	0.448532
2006-09-01	-1.53412	-1.53412	-1.46898	0.283193	-0.774035
2006-10-01	0.229947	0.229947	-1.24773	-1.14412	0.129731
2006-11-01	1.31192	1.31192	0.0839575	-0.234981	1.21187
2006-12-01	1.09478	1.09478	0.926071	0.955892	0.994905
2007-01-01	1.14808	1.14808	0.789766	1.03989	1.04811
2007-02-01	1.32914	1.32914	0.854706	0.944151	1.22937
2007-03-01	1.35348	1.35348	1.01681	1.10429	1.27536
2007-04-01	1.41158	1.41158	1.0601	1.18468	1.39262
2007-05-01	1.12701	1.12701	1.12781	1.22069	1.22677
2007-06-01	1.35087	1.35087	0.931705	1.27875	1.17399
2007-07-01	1.55869	1.55869	1.11894	1.15022	1.25426
2007-08-01	1.03985	1.03985	1.29675	1.24901	1.28506
2007-09-01	1.48178	1.48178	0.91908	1.30514	1.13243
2007-10-01	1.22332	1.22332	1.26785	1.06812	1.16787
2007-11-01	1.16315	1.16315	1.08629	1.27695	1.1914
2007-12-01	1.16308	1.16308	1.05089	1.1131	1.14006
2008-01-01	1.08792	1.08792	1.05968	1.1769	1.04989
2008-02-01	0.922767	0.922767	1.01012	1.12486	1.11395
2008-03-01	0.869443	0.869443	0.889466	1.07141	0.870388
2008-04-01	0.891815	0.891815	0.851154	0.960248	0.851814
2008-05-01	0.837719	0.837719	0.869769	0.879423	0.832408
2008-06-01	0.674365	0.674365	0.829977	0.878248	0.756159
2008-07-01	0.0947201	0.0947201	0.705183	0.830438	0.640712
2008-08-01	0.310158	0.310158	0.257773	0.652996	0.27971
2008-09-01	-1.53412	-1.53412	0.410317	0.191993	0.53399
2008-10-01	0.818742	0.818742	-1.01339	0.180149	-0.195125
2008-11-01	0.577832	0.577832	0.751842	0.120824	0.677885
2008-12-01	0.827772	0.827772	0.57217	0.690828	0.727689
2009-01-01	0.988452	0.988452	0.76449	0.682249	0.888844
2009-02-01	0.90503	0.90503	0.892825	0.800891	1.00496
2009-03-01	0.964792	0.964792	0.836316	0.977126	0.972422
2009-04-01	0.84109	0.84109	0.887607	0.90519	0.949743
2009-05-01	0.995297	0.995297	0.798723	0.956904	0.872615
2009-06-01	1.04499	1.04499	0.920442	0.823697	0.951847
2009-07-01	1.46657	1.46657	0.964485	0.974772	0.97703
2009-08-01	2.06999	2.06999	1.29447	1.01099	1.29453
2009-09-01	1.82835	1.82835	1.77125	1.25129	1.54339
2009-10-01	1.45026	1.45026	1.60928	1.51768	1.416
2009-11-01	1.06898	1.06898	1.33629	1.50347	1.16872
2009-12-01	1.54225	1.54225	1.05256	1.28488	1.35625
2010-01-01	1.28587	1.28587	1.41718	1.19693	1.27979
2010-02-01	1.18873	1.18873	1.23021	1.30291	1.08921
2010-03-01	1.25842	1.25842	1.16002	1.1712	1.04652
2010-04-01	1.33508	1.33508	1.21578	1.18988	1.14636
2010-05-01	1.5439	1.5439	1.27799	1.19434	1.28853
2010-06-01	0.915135	0.915135	1.4428	1.20475	1.20133
2010-07-01	0.443875	0.443875	0.968068	1.29858	1.02478
2010-08-01	0.774884	0.774884	0.602121	0.94719	0.753194
2010-09-01	0.139326	0.139326	0.843766	0.792771	0.871471
2010-10-01	0.205799	0.205799	0.350434	0.720235	0.252505
2010-11-01	0.0514879	0.0514879	0.384836	0.0491804	0.180682
2010-12-01	0.714998	0.714998	0.252271	0.156426	0.464906
2011-01-01	0.772563	0.772563	0.745821	0.12937	0.68492
2011-02-01	0.787906	0.787906	0.787585	0.792287	0.796879
2011-03-01	0.822739	0.822739	0.79818	0.761319	0.752265
2011-04-01	0.885786	0.885786	0.824112	0.7995	0.916159
2011-05-01	1.11685	1.11685	0.872403	0.829619	0.912421
2011-06-01	0.856899	0.856899	1.05084	0.887005	1.06177
2011-07-01	0.831027	0.831027	0.856481	1.06648	0.838519
2011-08-01	0.569796	0.569796	0.836652	0.840194	0.836297
2011-09-01	0.336868	0.336868	0.635667	0.870445	0.651332
2011-10-01	0.847611	0.847611	0.451664	0.532047	0.407102
2011-11-01	1.37705	1.37705	0.834709	0.334827	0.805636
2011-12-01	1.41855	1.41855	1.24217	0.893447	1.22282
2012-01-01	1.30261	1.30261	1.28465	1.2676	1.31698
2012-02-01	1.24764	1.24764	1.20619	1.26645	1.19544
2012-03-01	1.28922	1.28922	1.17159	1.25294	1.31754
2012-04-01	1.29807	1.29807	1.20949	1.22766	1.3176
2012-05-01	1.066	1.066	1.22257	1.22349	1.18884
2012-06-01	0.9175	0.9175	1.05037	1.21146	1.05695
2012-07-01	0.856253	0.856253	0.937593	1.10234	0.95651
2012-08-01	1.01003	1.01003	0.888992	0.981619	0.863263
2012-09-01	0.481743	0.481743	1.00446	0.857697	0.879779
2012-10-01	-0.0748019	-0.0748019	0.599347	0.983748	0.470419
2012-11-01	0.603644	0.603644	0.162834	0.447743	0.266747
2012-12-01	0.810854	0.810854	0.664947	0.440916	0.879279
2013-01-01	0.644077	0.644077	0.81919	0.650495	0.744084
2013-02-01	0.648974	0.648974	0.690502	0.821527	0.571183
2013-03-01	0.676767	0.676767	0.690604	0.62849	0.776932
2013-04-01	0.77905	0.77905	0.708661	0.657439	0.731402
2013-05-01	0.640399	0.640399	0.78467	0.670566	0.739768
2013-06-01	0.152701	0.152701	0.677787	0.792679	0.614742
2013-07-01	0.288154	0.288154	0.300445	0.612643	0.252505
2013-08-01	0.250871	0.250871	0.392793	0.192328	0.515798
2013-09-01	-0.0709889	-0.0709889	0.355929	0.224071	0.383115
2013-10-01	0.860624	0.860624	0.100568	0.200659	-0.0441672
2013-11-01	1.24496	1.24496	0.802237	-0.0163735	0.941705
2013-12-01	1.03333	1.03333	1.10188	0.948009	1.1329
2014-01-01	0.957614	0.957614	0.950689	1.17283	0.990433
2014-02-01	0.951936	0.951936	0.899073	1.008	1.05161
2014-03-01	1.05326	1.05326	0.899325	1.01607	1.06398
2014-04-01	0.971128	0.971128	0.98125	0.927313	1.02026
2014-05-01	0.718503	0.718503	0.923874	1.01675	0.875775
2014-06-01	0.89779	0.89779	0.733661	0.957348	0.721547
2014-07-01	1.06085	1.06085	0.870102	0.746586	0.890882
2014-08-01	1.43548	1.43548	0.997458	0.894593	0.971592
2014-09-01	0.946946	0.946946	1.29005	1.02686	1.23434
2014-10-01	1.22584	1.22584	0.926467	1.25015	0.955175
2014-11-01	1.31192	1.31192	1.14218	0.927516	1.17199
2014-12-01	1.09006	1.09006	1.21486	1.17475	1.26367
2015-01-01	1.06638	1.06638	1.05218	1.17612	1.12021
2015-02-01	1.21563	1.21563	1.03698	1.10688	0.994514
2015-03-01	1.24052	1.24052	1.15388	1.09696	1.18862
2015-04-01	1.20005	1.20005	1.17785	1.12022	1.13601
2015-05-01	1.13238	1.13238	1.15172	1.14877	1.09035
2015-06-01	1.31295	1.31295	1.10358	1.15606	1.11875
2015-07-01	1.84779	1.84779	1.24446	1.13005	1.22756
2015-08-01	1.00801	1.00801	1.66045	1.18105	1.38277
2015-09-01	1.12481	1.12481	1.03052	1.41065	1.12229
2015-10-01	0.818742	0.818742	1.11841	0.983499	1.09092
2015-11-01	0.798155	0.798155	0.883953	1.0376	0.919599
2015-12-01	0.741226	0.741226	0.863011	0.795938	0.828999
2016-01-01	0.485788	0.485788	0.8142	0.841684	0.586157
2016-02-01	0.45905	0.45905	0.612357	0.702714	0.469783
2016-03-01	0.4469	0.4469	0.581861	0.447312	0.503482
2016-04-01	0.468686	0.468686	0.56286	0.432409	0.502156
2016-05-01	0.368212	0.368212	0.570451	0.394916	0.451939
2016-06-01	0.236029	0.236029	0.485303	0.446997	0.407967
2016-07-01	0.583752	0.583752	0.374606	0.310775	0.303842
2016-08-01	1.69162	1.69162	0.630631	0.198226	0.650513
2016-09-01	1.34549	1.34549	1.47743	0.624866	1.44548
2016-10-01	1.44575	1.44575	1.22858	1.44517	1.34584
2016-11-01	0.899786	0.899786	1.31476	1.20069	1.00137
2016-12-01	0.731831	0.731831	0.90595	1.28366	1.11312
2017-01-01	0.842925	0.842925	0.776528	0.940406	0.94287
2017-02-01	0.691129	0.691129	0.858292	0.825353	0.741677
2017-03-01	0.701994	0.701994	0.740551	0.81388	0.602581
2017-04-01	0.560244	0.560244	0.744999	0.650142	0.563958
2017-05-01	0.750063	0.750063	0.632793	0.707952	0.586759
2017-06-01	0.926591	0.926591	0.772799	0.507268	0.71681
2017-07-01	0.451712	0.451712	0.906526	0.773284	0.867551
2017-08-01	-0.242826	-0.242826	0.54355	0.930884	0.418489
2017-09-01	1.46624	1.46624	0.00313196	0.386942	0.153597
2017-10-01	1.36007	1.36007	1.29578	0.429273	1.42129
2017-11-01	1.29322	1.29322	1.2277	1.28973	1.19308
2017-12-01	1.05556	1.05556	1.1868	1.151	0.955704
2018-01-01	1.49394	1.49394	1.01274	1.1741	1.36118
2018-02-01	1.40897	1.40897	1.35265	1.09321	1.46386
2018-03-01	1.25075	1.25075	1.29855	1.24112	1.21108
2018-04-01	1.27346	1.27346	1.18578	1.24951	1.17325
2018-05-01	1.29798	1.29798	1.20834	1.23649	1.21562
2018-06-01	1.59238	1.59238	1.23229	1.23273	1.28549
2018-07-01	0.177355	0.177355	1.46347	1.21056	1.23155
2018-08-01	0.093792	0.093792	0.387334	1.30732	0.502376
2018-09-01	0.780755	0.780755	0.306644	0.344977	0.681341
2018-10-01	1.39644	1.39644	0.817248	0.640374	1.04586
2018-11-01	1.2749	1.2749	1.28702	1.02969	1.17504
2018-12-01	1.32767	1.32767	1.20234	1.29159	1.22738
2019-01-01	1.22559	1.22559	1.24857	1.18335	1.18773
2019-02-01	1.41425	1.41425	1.17643	1.24763	1.31438
2019-03-01	1.36516	1.36516	1.32514	1.19477	1.38131
2019-04-01	1.2632	1.2632	1.29447	1.25685	1.21872
2019-05-01	1.31343	1.31343	1.22177	1.24408	1.21508
2019-06-01	1.2605	1.2605	1.26359	1.2456	1.21163
2019-07-01	0.516496	0.516496	1.16098	1.25231	1.22439
2019-08-01	1.02839	1.02839	1.09093	1.20712	1.24382
2019-09-01	0.934878	0.934878	1.04267	1.29228	0.734242
2019-10-01	0.682945	0.682945	1.00943	0.686715	0.952086
2019-11-01	0.672706	0.672706	0.986522	0.935717	0.782675
2019-12-01	0.63161	0.63161	0.970744	0.8685	0.642713
2020-01-01	0.550793	0.550793	0.959874	0.705439	0.709707
2020-02-01	0.447539	0.447539	0.952385	0.661372	0.650803
2020-03-01	0.453528	0.453528	0.947226	0.592146	0.498708
2020-04-01	0.597918	0.597918	0.943672	0.517779	0.477571
2020-05-01	0.58092	0.58092	0.56208	0.398517	0.497816
2020-06-01	0.851	0.851	0.083	0.254	0.064
2020-07-01	1.418	1.418	0.11	0.182	0.669
2020-08-01	0.12	0.12	0.082	0.131	0.83
2020-09-01	0.262	0.262	0.085	0.094	0.352
2020-10-01	0.4	0.4	0.059	0.067	-0.501
2020-11-01	0.369	0.369	0.433	0.048	0.338
2020-12-01	0.322	0.322	0.025	0.035	0.294
2021-01-01	0.23	0.23	0.096	0.025	0.25
2021-02-01	1.646	1.646	-0.028	0.018	0.839
2021-03-01	0.84	0.84	-0.013	0.013	1.416
2021-04-01	-0.526	-0.526	-0.02	0.009	0.399
2021-05-01	1.491	1.491	-0.025	0.007	0.227
